# Supplementary material
Source: publisher figshare collection journal article supplement (https://gsajournals.figshare.com/ndownloader/files/12285185)
Supplement: Supplementary file 1 [file 12285185]

## Sheet: VCFforSGE1_genotypeCorrected.vc
File S2. GATK SNP calls for sequenced wild S. cerevisiae strains.
Nucleotide position in Chromosome XVI	REFERENCE ALLELE (S288C)	ALTERNATE ALLELE (SNP)	SNP description	273614N	378604X*	CBS7960	DBVPG1106	DBVPG1373*	DBVPG1788*	DBVPG1853	DBVPG6044*	DBVPG6765*	Ethanol Red®	I14	IL-01*	K1	K10	K11*	K9	L-1374	L-1528	NCYC361*	PW5*	SB*	T73	UC5*	UWOPS03-461.4*	UWOPS05-217.3*	UWOPS05-227.2*	UWOPS83-787.3*	UWOPS87-2421*	W303*	WE372	Y2209*	Y3	Y389*	Y6*	Y7568	YB4081	YB4082	YB908	YJM189	YJM195	YJM244	YJM248	YJM270	YJM320	YJM326	YJM339
932796	T	C	ANN=C|intergenic_region|MODIFIER|YPR196W-YPR197C|YPR196W-YPR197C|intergenic_region|YPR196W-YPR197C|||||||||	T/T	T/T	T/T	T/T	T/T	T/T	T/T	T/T	T/T	T/T	T/T	C/C	T/T	T/T	T/T	T/T	T/T	T/T	T/T	T/T	T/T	T/T	T/T	T/T	T/T	T/T	T/T	T/T	T/T	T/T	T/T	T/T	T/T	T/T	T/T	T/T	T/T	C/C	T/T	T/T	T/T	T/T	T/T	T/T	T/T	T/T
932799	T	C	ANN=C|intergenic_region|MODIFIER|YPR196W-YPR197C|YPR196W-YPR197C|intergenic_region|YPR196W-YPR197C|||||||||	T/T	T/T	T/T	T/T	T/T	T/T	T/T	C/C	T/T	T/T	T/T	T/T	T/T	T/T	T/T	T/T	T/T	T/T	T/T	T/T	T/T	T/T	T/T	T/T	T/T	T/T	T/T	T/T	T/T	T/T	T/T	T/T	T/T	T/T	T/T	T/T	T/T	T/T	T/T	C/C	T/T	T/T	T/T	T/T	T/T	T/T
932818	T	C	ANN=C|intergenic_region|MODIFIER|YPR196W-YPR197C|YPR196W-YPR197C|intergenic_region|YPR196W-YPR197C|||||||||	T/T	T/T	T/T	T/T	T/T	T/T	T/T	T/T	T/T	T/T	T/T	T/T	T/T	T/T	T/T	T/T	T/T	T/T	T/T	T/T	T/T	T/T	T/T	T/T	T/T	T/T	T/T	T/T	T/T	T/T	T/T	T/T	T/T	T/T	T/T	T/T	T/T	T/T	T/T	T/T	T/T	T/T	T/T	T/T	T/T	T/T
932822	G	A	ANN=A|intergenic_region|MODIFIER|YPR196W-YPR197C|YPR196W-YPR197C|intergenic_region|YPR196W-YPR197C|||||||||	G/G	G/G	G/G	G/G	G/G	G/G	G/G	G/G	G/G	G/G	G/G	G/G	G/G	G/G	G/G	G/G	G/G	G/G	G/G	G/G	G/G	G/G	G/G	G/G	G/G	G/G	G/G	G/G	G/G	G/G	G/G	G/G	G/G	G/G	G/G	G/G	G/G	G/G	G/G	G/G	G/G	G/G	G/G	G/G	G/G	G/G
932826	C	T	ANN=T|intergenic_region|MODIFIER|YPR196W-YPR197C|YPR196W-YPR197C|intergenic_region|YPR196W-YPR197C|||||||||	C/T	C/C	C/C	C/C	C/C	C/C	C/C	C/C	C/C	C/C	C/C	C/C	C/C	C/C	C/C	C/C	C/C	C/C	C/C	T/T	C/C	C/C	C/C	C/C	C/C	C/C	C/C	C/C	C/C	C/C	C/C	C/C	C/C	C/C	C/C	C/C	C/C	C/C	C/C	C/C	C/C	C/C	C/C	C/C	C/C	C/C
932827	C	T	ANN=T|intergenic_region|MODIFIER|YPR196W-YPR197C|YPR196W-YPR197C|intergenic_region|YPR196W-YPR197C|||||||||	C/C	C/C	C/C	C/C	C/C	C/C	T/T	C/C	C/C	C/C	C/C	C/C	C/C	C/C	C/C	C/C	C/C	C/C	C/C	C/C	C/C	C/C	C/C	C/C	C/C	C/C	C/C	C/C	C/C	C/C	C/C	C/C	C/C	C/C	C/C	C/C	C/C	C/C	C/C	C/C	C/C	C/C	C/C	C/C	C/C	C/C
932832	G	A	ANN=A|intergenic_region|MODIFIER|YPR196W-YPR197C|YPR196W-YPR197C|intergenic_region|YPR196W-YPR197C|||||||||	G/G	G/G	G/G	G/G	G/G	G/G	G/G	G/G	G/G	G/G	G/G	G/G	G/G	G/G	G/G	G/G	G/G	G/G	G/G	G/G	G/G	G/G	G/G	A/A	A/A	A/A	G/G	G/G	G/G	G/G	G/G	G/G	G/G	G/A	G/G	A/A	G/G	G/G	G/G	G/G	G/G	G/G	G/G	G/G	G/G	G/G
932838	C	T	ANN=T|intergenic_region|MODIFIER|YPR196W-YPR197C|YPR196W-YPR197C|intergenic_region|YPR196W-YPR197C|||||||||	C/C	C/C	C/C	C/C	C/C	C/C	C/C	C/C	C/C	C/C	C/C	C/C	C/C	C/C	C/C	C/C	C/C	C/C	C/C	C/C	C/C	C/C	C/C	C/C	C/C	C/C	C/C	C/C	C/C	C/C	C/C	C/C	C/T	C/C	C/C	C/C	C/C	C/C	C/C	C/C	C/C	C/C	C/C	C/C	C/C	C/C
932845	T	A	ANN=A|intergenic_region|MODIFIER|YPR196W-YPR197C|YPR196W-YPR197C|intergenic_region|YPR196W-YPR197C|||||||||	T/T	T/T	T/T	T/T	T/T	T/T	T/T	T/T	T/T	T/T	T/T	T/T	T/T	T/T	T/T	T/T	T/T	T/T	T/T	T/T	T/T	T/T	T/T	T/T	T/T	T/T	T/T	T/T	T/T	T/T	T/T	T/T	T/T	T/T	T/T	T/T	T/T	T/T	T/T	T/T	T/T	T/T	T/T	T/T	T/T	T/T
932855	C	T	ANN=T|intergenic_region|MODIFIER|YPR196W-YPR197C|YPR196W-YPR197C|intergenic_region|YPR196W-YPR197C|||||||||	T/T	T/T	T/T	T/T	T/T	T/T	T/T	T/T	C/C	T/T	C/C	T/T	T/T	T/T	T/T	T/T	T/T	C/C	T/T	T/T	T/T	T/T	T/T	T/T	T/T	T/T	T/T	T/T	C/C	T/T	T/T	T/T	T/T	C/T	T/T	T/T	T/T	T/T	C/C	T/T	T/T	T/T	T/T	T/T	T/T	T/T
932863	T	C	ANN=C|intergenic_region|MODIFIER|YPR196W-YPR197C|YPR196W-YPR197C|intergenic_region|YPR196W-YPR197C|||||||||	T/T	T/T	T/T	T/T	T/T	T/T	T/T	C/C	T/T	T/T	T/T	T/T	T/T	T/T	T/T	T/T	T/T	T/T	T/T	T/T	T/T	T/T	T/T	T/T	T/T	T/T	T/T	T/T	T/T	T/T	T/T	T/T	T/T	T/T	T/T	T/T	T/T	T/T	T/T	C/C	T/T	T/T	T/T	T/T	T/T	T/T
932875	C	T	ANN=T|intergenic_region|MODIFIER|YPR196W-YPR197C|YPR196W-YPR197C|intergenic_region|YPR196W-YPR197C|||||||||	C/C	C/C	C/C	C/C	C/C	C/C	C/C	T/T	C/C	C/C	C/C	C/C	C/C	C/C	C/C	C/C	C/C	C/C	C/C	C/C	C/C	C/C	C/C	C/C	C/C	C/C	C/C	C/C	C/C	C/C	C/C	C/C	C/C	C/C	C/C	C/C	C/C	C/C	C/C	T/T	C/C	C/C	C/C	C/C	C/C	C/C
932882	C	A	ANN=A|intergenic_region|MODIFIER|YPR196W-YPR197C|YPR196W-YPR197C|intergenic_region|YPR196W-YPR197C|||||||||	A/A	A/A	A/A	A/A	A/A	A/A	A/A	A/A	C/C	A/A	C/C	A/A	A/A	A/A	A/A	A/A	A/A	C/C	A/A	A/A	A/A	A/A	A/A	A/A	A/A	A/A	A/A	A/A	C/C	A/A	A/A	A/A	A/A	A/A	A/A	A/A	A/A	A/A	C/C	A/A	A/A	A/A	A/A	A/A	A/A	A/A
932898	A	C	ANN=C|intergenic_region|MODIFIER|YPR196W-YPR197C|YPR196W-YPR197C|intergenic_region|YPR196W-YPR197C|||||||||	A/A	A/A	A/A	A/A	A/A	A/A	A/A	C/C	A/A	A/A	A/A	A/A	A/A	A/A	A/A	A/A	A/A	A/A	A/A	A/A	A/A	A/A	A/A	A/A	A/A	A/A	A/A	A/A	A/A	A/A	A/A	A/A	A/A	A/A	A/A	A/A	A/A	A/A	A/A	C/C	A/A	A/A	A/A	A/A	A/A	A/A
932910	G	T	ANN=T|intergenic_region|MODIFIER|YPR196W-YPR197C|YPR196W-YPR197C|intergenic_region|YPR196W-YPR197C|||||||||	G/G	G/G	G/G	G/G	G/G	G/G	G/G	G/G	G/G	G/G	G/G	G/G	G/G	G/G	G/G	G/G	G/G	G/G	G/G	G/G	G/G	G/G	G/G	G/G	G/G	G/G	G/G	G/G	G/G	G/G	G/G	G/G	G/G	G/G	G/G	G/G	G/G	G/G	G/G	G/G	G/G	G/G	G/G	G/G	G/G	G/G
932926	C	T	ANN=T|intergenic_region|MODIFIER|YPR196W-YPR197C|YPR196W-YPR197C|intergenic_region|YPR196W-YPR197C|||||||||	C/C	C/C	C/C	C/C	C/C	C/C	C/C	C/C	C/C	C/C	C/C	C/C	C/C	C/C	C/C	C/C	C/C	C/C	C/C	C/C	C/C	C/C	C/C	C/C	C/C	C/C	T/T	C/C	C/C	C/C	C/C	C/C	C/C	C/C	C/C	C/C	C/C	C/C	C/C	C/C	C/C	C/C	C/C	C/C	C/C	C/C
932937	A	C	ANN=C|intergenic_region|MODIFIER|YPR196W-YPR197C|YPR196W-YPR197C|intergenic_region|YPR196W-YPR197C|||||||||	A/A	A/A	A/A	A/A	A/A	A/A	A/A	C/C	A/A	A/A	A/A	A/A	A/A	A/A	A/A	A/A	A/A	A/A	A/A	A/A	A/A	A/A	A/A	A/A	A/A	A/A	A/A	A/A	A/A	A/A	A/A	A/A	A/A	A/A	A/A	A/A	A/A	A/A	A/A	C/C	A/A	A/A	A/A	A/A	A/A	A/A
932948	T	G	ANN=G|intergenic_region|MODIFIER|YPR196W-YPR197C|YPR196W-YPR197C|intergenic_region|YPR196W-YPR197C|||||||||	T/T	T/T	G/G	T/T	T/T	T/T	T/T	T/T	T/T	T/T	T/T	T/T	T/T	T/T	T/T	T/T	T/T	T/T	T/T	T/T	T/T	G/G	T/T	T/T	T/T	T/T	T/T	T/T	T/T	T/T	T/T	T/T	T/T	T/T	T/T	T/T	T/T	T/T	T/T	T/T	T/T	T/T	T/T	T/T	T/T	T/T
932957	A	G	ANN=G|intergenic_region|MODIFIER|YPR196W-YPR197C|YPR196W-YPR197C|intergenic_region|YPR196W-YPR197C|||||||||	A/A	A/A	A/A	A/A	A/A	A/A	A/A	A/A	A/A	A/A	A/A	A/A	A/A	A/A	A/A	A/A	A/A	A/A	A/A	A/A	A/A	A/A	A/A	A/A	A/A	A/A	A/A	A/A	A/A	A/A	A/A	A/A	A/A	A/A	A/A	A/A	A/A	A/A	A/A	A/A	A/A	A/A	A/A	A/A	A/A	A/A
932981	G	A	ANN=A|intergenic_region|MODIFIER|YPR196W-YPR197C|YPR196W-YPR197C|intergenic_region|YPR196W-YPR197C|||||||||	G/G	G/G	G/G	G/G	G/G	G/G	G/G	G/G	G/G	G/G	G/G	G/G	G/G	G/G	G/G	G/G	G/G	G/G	G/G	G/G	G/G	G/G	G/G	G/G	G/G	G/G	G/G	G/G	G/G	G/G	G/G	G/G	G/G	G/G	G/G	G/G	G/G	G/G	G/G	G/G	G/G	G/G	G/G	G/G	G/G	G/G
933005	C	T	ANN=T|intergenic_region|MODIFIER|YPR196W-YPR197C|YPR196W-YPR197C|intergenic_region|YPR196W-YPR197C|||||||||	C/C	C/C	C/C	C/C	C/C	C/C	C/C	T/T	C/C	C/C	C/C	C/C	C/C	C/C	C/C	C/C	C/C	C/C	C/C	C/C	C/C	C/C	C/C	C/C	C/C	C/C	C/C	C/C	C/C	C/C	C/C	C/C	C/C	C/C	C/C	C/C	C/C	C/C	C/C	T/T	C/C	C/C	C/C	C/C	C/C	C/C
933012	C	T	ANN=T|intergenic_region|MODIFIER|YPR196W-YPR197C|YPR196W-YPR197C|intergenic_region|YPR196W-YPR197C|||||||||	C/C	C/C	C/C	C/C	C/C	C/C	C/C	C/C	C/C	C/C	C/C	C/C	C/C	C/C	C/C	C/C	C/C	C/C	C/C	C/C	C/C	C/C	C/C	C/C	C/C	C/C	C/C	C/C	C/C	C/C	C/C	C/C	C/C	C/C	C/C	C/C	C/C	C/C	C/C	C/C	C/C	C/C	C/C	C/C	C/C	C/C
933072	A	T	ANN=T|intergenic_region|MODIFIER|YPR196W-YPR197C|YPR196W-YPR197C|intergenic_region|YPR196W-YPR197C|||||||||	A/A	A/A	A/A	A/A	A/A	A/A	A/A	A/A	A/A	A/A	A/A	A/A	A/A	A/A	A/A	A/A	A/A	A/A	A/A	A/A	A/A	A/A	A/A	A/A	A/A	A/A	A/A	A/A	A/A	A/A	A/A	A/A	A/A	A/A	A/A	A/A	A/A	A/A	A/A	A/A	A/A	A/A	A/A	A/A	A/A	A/A
933076	A	G	ANN=G|intergenic_region|MODIFIER|YPR196W-YPR197C|YPR196W-YPR197C|intergenic_region|YPR196W-YPR197C|||||||||	A/A	A/A	A/A	A/A	A/A	A/A	A/A	A/A	A/A	A/A	A/A	A/A	A/A	A/A	A/A	A/A	A/A	A/A	A/A	A/A	A/A	A/A	A/A	G/G	G/G	G/G	A/A	A/A	A/A	A/A	A/A	A/A	A/A	A/G	A/A	G/G	A/A	A/A	A/A	A/A	A/A	A/A	A/A	A/A	A/A	A/A
933079	T	C	ANN=C|intergenic_region|MODIFIER|YPR196W-YPR197C|YPR196W-YPR197C|intergenic_region|YPR196W-YPR197C|||||||||	T/T	T/T	T/T	T/T	T/T	T/T	T/T	T/T	T/T	T/T	T/T	T/T	T/T	T/T	T/T	T/T	T/T	T/T	T/T	T/T	T/T	T/T	T/T	C/C	C/C	C/C	T/T	T/T	T/T	T/T	T/T	T/T	T/T	T/C	T/T	C/C	T/T	T/T	T/T	T/T	T/T	T/T	T/T	T/T	T/T	T/T
933086	T	A	ANN=A|intergenic_region|MODIFIER|YPR196W-YPR197C|YPR196W-YPR197C|intergenic_region|YPR196W-YPR197C|||||||||	T/T	T/T	T/T	T/T	T/T	T/T	T/T	T/T	T/T	T/T	T/T	T/T	T/T	T/T	T/T	T/T	T/T	T/T	T/T	T/T	T/T	T/T	T/T	T/T	T/T	T/T	T/T	T/T	T/T	T/T	T/T	T/T	T/T	T/T	T/T	T/T	T/T	T/T	T/T	T/T	T/T	T/T	T/T	T/T	T/T	T/T
933090	C	G	ANN=G|intergenic_region|MODIFIER|YPR196W-YPR197C|YPR196W-YPR197C|intergenic_region|YPR196W-YPR197C|||||||||	C/C	C/C	C/C	C/C	C/C	C/C	C/C	C/C	C/C	C/C	C/C	C/C	C/C	C/C	C/C	C/C	C/C	C/C	C/C	C/C	C/C	C/C	C/C	G/G	G/G	G/G	C/C	C/C	C/C	C/C	C/C	C/C	C/C	C/G	C/C	G/G	C/C	C/C	C/C	C/C	C/C	C/C	C/C	C/C	C/C	C/C
933110	A	G	ANN=G|intergenic_region|MODIFIER|YPR196W-YPR197C|YPR196W-YPR197C|intergenic_region|YPR196W-YPR197C|||||||||	A/A	A/A	A/A	A/A	A/A	A/A	A/A	G/G	A/A	A/A	A/A	A/A	A/A	A/A	A/A	A/A	A/A	A/A	A/A	A/A	A/A	A/A	A/A	A/A	A/A	A/A	A/A	A/A	A/A	A/A	A/A	A/A	A/A	A/A	A/A	A/A	A/A	A/A	A/A	G/G	A/A	A/A	A/A	A/A	A/A	A/A
933137	A	G	ANN=G|intergenic_region|MODIFIER|YPR196W-YPR197C|YPR196W-YPR197C|intergenic_region|YPR196W-YPR197C|||||||||	A/A	A/A	A/A	A/A	A/A	A/A	A/A	A/A	A/A	A/A	A/A	A/A	A/A	A/A	A/A	A/A	A/A	A/A	A/A	A/A	A/A	A/A	A/A	A/A	A/A	A/A	A/A	A/A	A/A	A/A	A/A	A/A	A/A	A/A	A/A	A/A	A/A	A/A	A/A	A/A	A/A	A/A	A/A	A/A	A/A	A/A
933138	T	C	ANN=C|intergenic_region|MODIFIER|YPR196W-YPR197C|YPR196W-YPR197C|intergenic_region|YPR196W-YPR197C|||||||||	T/T	T/T	T/T	T/T	T/T	T/T	T/T	T/T	T/T	T/T	T/T	T/T	T/T	T/T	T/T	T/T	T/T	T/T	T/T	T/T	T/T	T/T	T/T	T/T	T/T	T/T	T/T	T/T	T/T	T/T	T/T	T/T	T/T	T/T	T/T	T/T	T/T	T/T	T/T	T/T	T/T	T/T	T/T	T/T	T/T	T/T
933143	G	A	ANN=A|intergenic_region|MODIFIER|YPR196W-YPR197C|YPR196W-YPR197C|intergenic_region|YPR196W-YPR197C|||||||||	G/G	G/G	G/G	G/G	G/G	G/G	G/G	G/G	G/G	G/G	G/G	G/G	G/G	G/G	G/G	G/G	G/G	G/G	G/G	G/G	G/G	G/G	G/G	G/G	G/G	G/G	G/G	G/G	G/G	G/G	G/G	G/G	G/G	G/G	G/G	G/G	G/G	G/G	G/G	G/G	G/G	G/G	G/G	G/G	G/G	G/G
933153	A	G	ANN=G|intergenic_region|MODIFIER|YPR196W-YPR197C|YPR196W-YPR197C|intergenic_region|YPR196W-YPR197C|||||||||	A/A	G/G	A/A	A/A	A/A	A/A	A/A	A/A	A/A	A/G	A/A	A/A	G/G	G/G	G/G	G/G	A/A	A/A	A/A	A/A	A/A	A/A	G/G	A/A	A/A	A/A	A/A	G/G	A/A	A/A	A/A	G/G	A/G	A/G	A/A	A/A	G/G	A/A	A/A	A/A	A/A	A/A	A/A	G/G	G/G	A/G
933162	C	T	ANN=T|intergenic_region|MODIFIER|YPR196W-YPR197C|YPR196W-YPR197C|intergenic_region|YPR196W-YPR197C|||||||||	C/C	C/C	C/C	C/C	C/C	C/C	C/C	C/C	C/C	C/C	C/C	C/C	C/C	C/C	C/C	C/C	C/C	C/C	C/C	C/C	C/C	C/C	C/C	C/C	C/C	C/C	C/C	C/C	C/C	C/C	C/C	C/C	C/C	C/C	C/C	C/C	C/C	C/C	C/C	C/C	C/C	C/C	C/C	C/C	C/C	C/C
933168	T	C	ANN=C|intergenic_region|MODIFIER|YPR196W-YPR197C|YPR196W-YPR197C|intergenic_region|YPR196W-YPR197C|||||||||	T/T	T/T	T/T	T/T	T/T	T/T	T/T	T/T	C/C	T/T	C/C	T/T	T/T	T/T	T/T	T/T	T/T	C/C	T/T	T/T	T/T	T/T	T/T	T/T	T/T	T/T	T/T	T/T	T/T	T/T	T/T	T/T	T/T	T/C	T/T	T/T	T/T	T/T	C/C	T/T	T/T	T/T	T/T	T/T	T/T	T/T
933174	G	C	ANN=C|intergenic_region|MODIFIER|YPR196W-YPR197C|YPR196W-YPR197C|intergenic_region|YPR196W-YPR197C|||||||||	G/G	C/C	G/G	G/G	G/G	G/G	G/G	G/G	G/G	C/C	G/G	G/G	C/C	C/C	C/C	C/C	G/G	G/G	G/G	G/G	G/G	G/G	C/C	G/G	G/G	G/G	G/G	C/C	G/G	G/G	G/G	C/C	G/C	G/C	G/G	G/G	C/C	G/G	G/G	G/G	G/G	G/G	G/G	C/C	C/C	C/C
933187	T	G	ANN=G|intergenic_region|MODIFIER|YPR196W-YPR197C|YPR196W-YPR197C|intergenic_region|YPR196W-YPR197C|||||||||	T/T	T/T	T/T	T/T	T/T	T/T	T/T	G/G	T/T	T/T	T/T	T/T	T/T	T/T	T/T	T/T	T/T	T/T	T/T	T/T	T/T	T/T	T/T	T/T	T/T	T/T	T/T	T/T	T/T	T/T	T/T	T/T	T/T	T/T	T/T	T/T	T/T	T/T	T/T	G/G	T/T	T/T	T/T	T/T	T/T	T/T
933190	A	G	ANN=G|intergenic_region|MODIFIER|YPR196W-YPR197C|YPR196W-YPR197C|intergenic_region|YPR196W-YPR197C|||||||||	A/A	A/A	A/A	A/A	A/A	A/A	A/A	G/G	A/A	A/A	A/A	A/A	A/A	A/A	A/A	A/A	A/A	A/A	A/A	A/A	A/A	A/A	A/A	G/G	G/G	G/G	A/A	A/A	A/A	A/A	A/A	A/A	A/A	A/G	A/A	G/G	A/A	A/A	A/A	G/G	A/A	A/A	A/A	A/A	A/A	A/A
933191	T	C	ANN=C|intergenic_region|MODIFIER|YPR196W-YPR197C|YPR196W-YPR197C|intergenic_region|YPR196W-YPR197C|||||||||	T/T	T/T	T/T	T/T	T/T	T/T	T/T	T/T	T/T	T/T	T/T	T/T	T/T	T/T	T/T	T/T	T/T	T/T	T/T	T/T	T/T	T/T	T/T	T/T	T/T	T/T	T/T	T/T	T/T	T/T	T/T	T/T	T/T	T/T	T/T	T/T	T/T	T/T	T/T	T/T	T/T	T/T	T/T	T/T	T/T	T/T
933205	C	T	ANN=T|intergenic_region|MODIFIER|YPR196W-YPR197C|YPR196W-YPR197C|intergenic_region|YPR196W-YPR197C|||||||||	C/C	C/C	C/C	C/C	C/C	C/C	C/C	C/C	C/C	C/C	C/C	C/C	C/C	C/C	C/C	C/C	C/C	C/C	C/C	C/C	C/C	C/C	C/C	T/T	T/T	T/T	C/C	C/C	C/C	C/C	C/C	C/C	C/C	C/T	C/C	T/T	C/C	C/C	C/C	C/C	C/C	C/C	C/C	C/C	C/C	C/C
933227	A	T	ANN=T|intergenic_region|MODIFIER|YPR196W-YPR197C|YPR196W-YPR197C|intergenic_region|YPR196W-YPR197C|||||||||	A/A	T/T	A/A	A/A	A/A	A/A	A/A	A/A	A/A	A/T	A/A	A/A	T/T	T/T	T/T	T/T	A/A	A/A	A/A	A/A	A/A	A/A	T/T	A/A	A/A	A/A	A/A	T/T	A/A	A/A	A/A	T/T	A/T	A/T	A/A	A/A	T/T	A/A	A/A	A/A	A/A	A/A	A/A	T/T	T/T	T/T
933296	G	T	ANN=T|intergenic_region|MODIFIER|YPR196W-YPR197C|YPR196W-YPR197C|intergenic_region|YPR196W-YPR197C|||||||||	G/G	G/G	G/G	G/G	G/G	G/G	G/G	G/G	G/G	G/G	G/G	G/G	G/G	G/G	G/G	G/G	G/G	G/G	G/G	G/G	G/G	G/G	G/G	G/G	G/G	G/G	G/G	G/G	G/G	G/G	G/G	G/G	G/G	G/G	G/G	G/G	G/G	G/G	G/G	T/T	G/G	G/G	G/G	G/G	G/G	N/N
933312	A	G	ANN=G|intergenic_region|MODIFIER|YPR196W-YPR197C|YPR196W-YPR197C|intergenic_region|YPR196W-YPR197C|||||||||	A/A	G/G	A/A	A/A	A/A	A/A	A/A	G/G	A/A	G/G	A/A	A/A	G/G	G/G	G/G	G/G	A/A	A/A	A/A	A/A	A/A	A/A	G/G	A/A	A/A	A/A	G/G	G/G	A/A	A/A	A/A	G/G	A/G	A/G	A/A	A/A	G/G	A/A	A/A	G/G	A/A	A/A	A/A	G/G	G/G	N/N
933316	C	T	ANN=T|intergenic_region|MODIFIER|YPR196W-YPR197C|YPR196W-YPR197C|intergenic_region|YPR196W-YPR197C|||||||||	C/C	T/T	C/C	C/C	C/C	C/C	C/C	T/T	C/C	T/T	C/C	C/C	T/T	T/T	T/T	T/T	C/C	C/C	C/C	C/C	C/C	C/C	T/T	C/C	C/C	C/C	T/T	T/T	C/C	C/C	C/C	T/T	C/T	C/T	C/C	C/C	T/T	C/C	C/C	T/T	C/C	C/C	C/C	T/T	T/T	N/N
933326	G	A	ANN=A|intergenic_region|MODIFIER|YPR196W-YPR197C|YPR196W-YPR197C|intergenic_region|YPR196W-YPR197C|||||||||	G/G	G/G	G/G	G/G	G/G	G/G	G/G	G/G	G/G	G/G	G/G	G/G	G/G	G/G	G/G	G/G	G/G	G/G	G/G	G/G	G/G	G/G	G/G	G/G	G/G	G/G	G/G	G/G	G/G	G/G	G/G	G/G	G/G	G/G	G/G	G/G	G/G	G/G	G/G	G/G	G/G	G/G	G/G	G/G	G/G	G/G
933355	C	T	ANN=T|intergenic_region|MODIFIER|YPR196W-YPR197C|YPR196W-YPR197C|intergenic_region|YPR196W-YPR197C|||||||||	C/C	C/C	C/C	C/C	C/C	C/C	T/T	C/C	C/C	C/C	C/C	C/C	C/C	C/C	C/C	C/C	C/C	C/C	C/C	C/C	C/C	C/C	C/C	C/C	C/C	C/C	C/C	C/C	C/C	C/C	C/C	C/C	C/C	C/C	C/C	C/C	C/C	C/C	C/C	C/C	C/C	C/C	C/C	C/C	C/C	C/C
933358	G	A	ANN=A|intergenic_region|MODIFIER|YPR196W-YPR197C|YPR196W-YPR197C|intergenic_region|YPR196W-YPR197C|||||||||	G/G	A/A	G/G	G/G	G/G	G/G	G/G	A/A	G/G	A/A	G/G	G/G	A/A	A/A	A/A	A/A	G/G	G/G	G/G	G/G	G/G	G/G	A/A	G/G	G/G	G/G	A/A	A/A	G/G	G/G	G/G	A/A	G/A	G/A	G/G	G/G	A/A	G/G	G/G	A/A	G/G	G/G	G/G	A/A	A/A	G/A
933363	C	T	ANN=T|intergenic_region|MODIFIER|YPR196W-YPR197C|YPR196W-YPR197C|intergenic_region|YPR196W-YPR197C|||||||||	C/C	C/C	C/C	C/C	C/C	C/C	T/T	C/C	C/C	C/C	C/C	C/C	C/C	C/C	C/C	C/C	C/C	C/C	C/C	C/C	C/C	C/C	C/C	C/C	C/C	C/C	C/C	C/C	C/C	C/C	C/C	C/C	C/C	C/C	C/C	C/C	C/C	C/C	C/C	C/C	C/C	C/C	C/C	C/C	C/C	C/C
933378	T	C	ANN=C|intergenic_region|MODIFIER|YPR196W-YPR197C|YPR196W-YPR197C|intergenic_region|YPR196W-YPR197C|||||||||	T/T	C/C	T/T	T/T	T/T	T/T	T/T	C/C	T/T	C/C	T/T	T/T	T/C	C/C	C/C	C/C	T/T	T/T	T/T	T/T	T/T	T/T	C/C	T/T	T/T	T/T	C/C	C/C	T/T	T/T	T/T	C/C	T/C	T/C	T/T	T/T	C/C	T/T	T/T	C/C	T/T	T/T	T/T	C/C	C/C	T/C
933386	T	C	ANN=C|intergenic_region|MODIFIER|YPR196W-YPR197C|YPR196W-YPR197C|intergenic_region|YPR196W-YPR197C|||||||||	T/C	T/T	T/T	T/T	T/T	T/T	T/T	T/T	T/T	T/T	T/T	T/T	T/T	T/T	T/T	T/T	T/T	T/T	T/T	C/C	T/T	T/T	T/T	T/T	T/T	T/T	T/T	T/T	T/T	T/T	T/T	T/T	T/C	T/T	T/T	T/T	T/T	T/T	T/T	T/T	T/T	T/T	T/T	T/T	T/T	T/C
933425	A	G	ANN=G|intergenic_region|MODIFIER|YPR196W-YPR197C|YPR196W-YPR197C|intergenic_region|YPR196W-YPR197C|||||||||	A/A	G/G	A/A	A/A	A/A	A/A	A/A	A/A	A/A	A/A	A/A	A/A	A/A	A/G	G/G	A/G	A/A	A/A	A/A	A/A	A/A	A/A	A/A	A/A	A/A	A/A	A/A	G/G	A/A	A/A	A/A	A/A	A/G	A/G	A/A	A/A	G/G	A/A	A/A	A/A	A/A	A/A	A/A	G/G	A/G	A/G
933437	A	G	ANN=G|intergenic_region|MODIFIER|YPR196W-YPR197C|YPR196W-YPR197C|intergenic_region|YPR196W-YPR197C|||||||||	A/A	A/A	A/A	A/A	A/A	A/A	A/A	A/A	A/A	A/G	A/A	A/A	A/G	A/A	A/A	A/A	A/A	A/A	A/A	A/A	A/A	A/A	A/A	A/G	G/G	G/G	A/A	A/A	A/A	A/A	A/A	A/A	A/A	A/G	A/A	G/G	A/A	A/A	A/A	A/A	A/A	A/A	A/A	A/A	A/A	A/A
933442	A	T	ANN=T|intergenic_region|MODIFIER|YPR196W-YPR197C|YPR196W-YPR197C|intergenic_region|YPR196W-YPR197C|||||||||	A/T	A/A	A/A	A/A	A/A	A/A	A/A	A/A	A/A	A/A	A/A	A/A	A/A	A/A	A/A	A/A	A/A	A/A	A/A	A/A	A/A	A/A	A/A	A/A	A/A	A/A	A/A	A/A	A/A	A/A	A/A	A/A	A/A	A/A	A/A	A/A	A/A	A/A	A/A	A/A	A/A	A/A	A/A	A/A	A/A	A/A
933444	G	A	ANN=A|intergenic_region|MODIFIER|YPR196W-YPR197C|YPR196W-YPR197C|intergenic_region|YPR196W-YPR197C|||||||||	G/G	G/G	G/G	G/G	G/G	G/G	G/G	G/G	G/G	G/G	G/G	G/G	G/G	G/G	G/G	G/G	G/G	G/G	G/G	G/G	G/G	G/G	G/G	G/G	G/G	G/G	G/G	G/G	G/G	G/G	G/G	G/G	G/G	G/G	G/G	G/G	G/G	G/G	G/G	G/G	G/G	G/G	G/G	G/G	G/G	G/G
933457	G	A	ANN=A|intergenic_region|MODIFIER|YPR196W-YPR197C|YPR196W-YPR197C|intergenic_region|YPR196W-YPR197C|||||||||	G/G	G/G	G/G	G/G	G/G	G/G	G/G	G/G	G/G	G/G	G/G	G/G	G/G	G/G	G/G	G/G	G/G	G/G	G/G	G/G	G/G	G/G	G/G	G/G	G/G	G/G	G/G	G/G	G/G	G/G	G/G	G/G	G/G	G/G	G/G	G/G	G/G	G/G	G/G	G/G	G/G	G/G	G/G	G/G	G/G	G/G
933484	G	T	ANN=T|intergenic_region|MODIFIER|YPR196W-YPR197C|YPR196W-YPR197C|intergenic_region|YPR196W-YPR197C|||||||||	G/G	T/T	G/G	G/G	G/G	G/G	G/G	G/G	G/G	G/T	G/G	G/G	G/T	T/T	T/T	T/T	G/G	G/G	G/G	G/G	G/G	G/G	T/T	G/G	G/G	G/G	T/T	G/G	G/G	G/G	G/G	T/T	G/T	G/T	G/G	G/G	T/T	G/G	G/G	G/G	G/G	G/G	G/G	T/T	T/T	T/T
933501	C	T	ANN=T|intergenic_region|MODIFIER|YPR196W-YPR197C|YPR196W-YPR197C|intergenic_region|YPR196W-YPR197C|||||||||	C/C	C/C	C/C	C/C	C/C	C/C	C/C	C/C	C/C	C/C	C/C	C/C	C/C	C/C	C/C	C/C	C/C	C/C	C/C	C/C	C/C	C/C	C/C	C/T	T/T	T/T	C/C	C/C	C/C	C/C	C/C	T/T	C/C	C/T	C/C	T/T	C/C	C/C	C/C	C/C	C/C	C/C	C/C	C/C	C/C	N/N
933516	A	T	ANN=T|intergenic_region|MODIFIER|YPR196W-YPR197C|YPR196W-YPR197C|intergenic_region|YPR196W-YPR197C|||||||||	A/A	A/A	A/A	A/A	A/A	A/A	A/A	T/T	A/A	A/A	A/A	A/A	A/A	A/A	A/A	A/A	A/A	A/A	A/A	A/A	A/A	A/A	A/A	A/T	T/T	T/T	T/T	A/A	A/A	A/A	A/A	T/T	A/A	A/T	A/A	T/T	A/A	A/A	A/A	T/T	A/A	A/A	A/A	A/A	A/A	A/A
933566	T	C,G	ANN=C|intergenic_region|MODIFIER|YPR196W-YPR197C|YPR196W-YPR197C|intergenic_region|YPR196W-YPR197C|||||||||,G|intergenic_region|MODIFIER|YPR196W-YPR197C|YPR196W-YPR197C|intergenic_region|YPR196W-YPR197C|||||||||	T/T	T/T	T/T	T/T	T/T	T/T	T/T	C,G/C,G	T/T	T/T	T/T	T/T	T/T	T/T	T/T	T/T	T/T	T/T	T/T	T/T	T/T	T/T	T/T	T/G	G/G	G/G	T/T	T/T	T/T	T/T	T/T	T/T	T/T	T/T	T/T	T/T	T/T	T/T	T/T	T/T	T/T	T/T	T/T	T/T	T/T	T/T
933567	C	T	ANN=T|intergenic_region|MODIFIER|YPR196W-YPR197C|YPR196W-YPR197C|intergenic_region|YPR196W-YPR197C|||||||||	C/C	C/C	C/C	C/C	C/C	C/C	C/C	C/C	C/C	C/C	C/C	C/C	C/C	C/C	C/C	C/C	C/C	C/C	C/C	C/C	C/C	C/C	C/C	C/C	C/C	C/C	C/C	C/C	C/C	C/C	C/C	C/C	C/C	C/C	C/C	C/C	T/T	C/C	C/C	C/C	C/C	C/C	C/C	T/T	C/T	C/C
933594	A	G	ANN=G|intergenic_region|MODIFIER|YPR196W-YPR197C|YPR196W-YPR197C|intergenic_region|YPR196W-YPR197C|||||||||	A/A	G/G	A/A	A/A	A/A	A/A	A/A	A/A	A/A	G/G	A/A	A/A	G/G	G/G	G/G	G/G	A/A	A/A	A/A	A/A	A/A	A/A	G/G	A/A	A/A	A/A	A/A	G/G	A/A	A/A	A/A	A/A	A/G	A/G	A/A	A/A	G/G	A/A	A/A	A/A	A/A	A/A	A/A	G/G	G/G	G/G
933628	A	G	ANN=G|intergenic_region|MODIFIER|YPR196W-YPR197C|YPR196W-YPR197C|intergenic_region|YPR196W-YPR197C|||||||||	A/A	A/A	A/A	A/A	A/A	A/A	A/A	A/A	G/G	A/A	G/G	A/A	A/A	A/A	A/A	A/A	A/A	G/G	A/A	A/A	A/A	A/A	A/A	A/A	A/A	A/A	A/A	A/A	A/A	A/A	G/G	A/A	A/A	A/A	G/G	A/A	A/A	A/A	G/G	A/A	A/A	A/A	A/A	A/A	A/A	A/G
933635	C	T	ANN=T|intergenic_region|MODIFIER|YPR196W-YPR197C|YPR196W-YPR197C|intergenic_region|YPR196W-YPR197C|||||||||	C/C	C/T	C/C	C/C	C/C	C/C	C/C	C/C	C/C	C/C	C/C	C/C	C/C	C/C	C/C	C/C	C/C	C/C	C/C	C/C	C/C	C/C	C/C	C/C	C/C	C/C	C/C	C/C	C/C	C/C	C/C	C/C	C/C	C/T	C/C	C/C	C/C	C/C	C/C	C/C	C/C	C/C	C/C	C/C	C/C	C/T
933712	T	G	ANN=G|intergenic_region|MODIFIER|YPR196W-YPR197C|YPR196W-YPR197C|intergenic_region|YPR196W-YPR197C|||||||||	T/T	G/G	T/T	T/T	T/T	T/T	T/T	T/T	T/T	T/G	T/T	T/T	G/G	G/G	G/G	G/G	T/T	T/T	T/T	T/T	T/T	T/T	G/G	T/T	T/T	T/T	T/T	T/T	T/T	T/T	T/T	T/T	T/G	T/G	T/T	T/T	G/G	T/T	T/T	T/T	T/T	T/T	T/T	G/G	G/G	T/G
933749	T	C	ANN=C|intergenic_region|MODIFIER|YPR196W-YPR197C|YPR196W-YPR197C|intergenic_region|YPR196W-YPR197C|||||||||	T/T	T/T	T/T	T/T	T/T	T/T	T/T	T/T	T/T	T/T	T/T	T/T	T/T	T/T	T/T	T/T	T/T	T/T	T/T	T/T	T/T	T/T	T/T	T/T	T/T	T/T	T/T	T/T	T/T	T/T	T/T	T/T	T/T	T/T	T/T	T/T	T/T	T/T	T/T	T/T	T/T	T/T	T/T	T/T	T/T	T/T
933766	T	C	ANN=C|intergenic_region|MODIFIER|YPR196W-YPR197C|YPR196W-YPR197C|intergenic_region|YPR196W-YPR197C|||||||||	T/T	T/T	T/T	T/T	T/T	T/T	T/T	T/T	C/C	T/T	C/C	T/T	T/T	T/T	T/T	T/T	T/T	C/C	T/T	T/T	T/T	T/T	T/T	T/T	T/T	T/T	T/T	T/T	T/T	T/T	T/T	T/T	T/T	T/T	T/T	T/T	T/T	T/T	C/C	T/T	T/T	T/T	T/T	T/T	T/T	T/T
933773	C	A	ANN=A|intergenic_region|MODIFIER|YPR196W-YPR197C|YPR196W-YPR197C|intergenic_region|YPR196W-YPR197C|||||||||	C/C	A/A	C/C	C/C	C/C	C/C	C/C	A/A	C/C	A/A	C/C	C/C	A/A	A/A	A/A	A/A	C/C	C/C	C/C	C/C	C/C	C/C	A/A	A/A	A/A	A/A	A/A	A/A	C/C	C/C	C/C	A/A	C/A	C/A	C/C	A/A	A/A	C/C	C/C	A/A	C/C	C/C	C/C	A/A	A/A	C/C
933791	C	T	ANN=T|intergenic_region|MODIFIER|YPR196W-YPR197C|YPR196W-YPR197C|intergenic_region|YPR196W-YPR197C|||||||||	C/C	C/C	C/C	C/C	C/C	C/C	C/C	C/C	C/C	C/C	C/C	C/C	C/C	C/C	C/C	C/C	C/C	C/C	C/C	C/C	C/C	C/C	C/C	C/T	N/N	T/T	C/C	C/C	C/C	C/C	C/C	C/C	C/C	C/C	C/C	C/C	C/C	C/C	C/C	C/C	C/C	C/C	C/C	C/C	C/C	C/C
933793	T	C	ANN=C|intergenic_region|MODIFIER|YPR196W-YPR197C|YPR196W-YPR197C|intergenic_region|YPR196W-YPR197C|||||||||	T/T	T/T	T/T	T/T	T/T	T/T	C/C	T/T	T/T	T/T	T/T	T/T	T/T	T/T	T/T	T/T	T/T	T/T	T/T	T/T	T/T	T/T	T/T	T/T	N/N	T/T	T/T	T/T	T/T	T/T	T/T	T/T	T/T	T/T	T/T	T/T	T/T	T/T	T/T	T/T	T/T	T/T	T/T	T/T	T/T	T/T
933799	A	G	ANN=G|intergenic_region|MODIFIER|YPR196W-YPR197C|YPR196W-YPR197C|intergenic_region|YPR196W-YPR197C|||||||||	A/A	A/A	A/A	A/A	A/A	A/A	A/A	A/A	A/A	A/A	A/A	A/A	A/A	A/A	A/A	A/A	A/A	A/A	A/A	A/A	A/A	A/A	A/A	A/A	N/N	A/A	A/A	A/A	A/A	A/A	A/A	A/A	A/A	A/A	A/A	A/A	A/A	A/A	A/A	A/A	A/A	A/A	A/A	A/A	A/A	A/A
933809	A	G	ANN=G|intergenic_region|MODIFIER|YPR196W-YPR197C|YPR196W-YPR197C|intergenic_region|YPR196W-YPR197C|||||||||	A/A	A/A	A/A	A/A	A/A	A/A	A/A	G/G	A/A	A/A	A/A	A/A	A/A	A/A	A/A	A/A	A/A	A/A	A/A	A/A	A/A	A/A	A/A	A/A	N/N	A/A	A/A	A/A	A/A	A/A	A/A	A/A	A/A	A/A	A/A	A/A	A/A	A/A	A/A	G/G	A/A	A/A	A/A	A/A	A/A	A/A
933821	C	T	ANN=T|intergenic_region|MODIFIER|YPR196W-YPR197C|YPR196W-YPR197C|intergenic_region|YPR196W-YPR197C|||||||||	C/C	C/C	C/C	C/C	C/C	C/C	C/C	C/C	C/C	C/C	C/C	C/C	C/C	C/C	C/C	C/C	C/C	C/C	C/C	C/C	C/C	C/C	C/C	C/C	C/C	C/C	C/C	C/C	C/C	C/C	C/C	C/C	C/C	C/C	C/C	C/C	C/C	C/C	C/C	C/C	C/C	C/C	C/C	C/C	C/C	C/C
933827	T	C	ANN=C|intergenic_region|MODIFIER|YPR196W-YPR197C|YPR196W-YPR197C|intergenic_region|YPR196W-YPR197C|||||||||	T/T	T/T	T/T	T/T	T/T	T/T	T/T	T/T	T/T	T/T	T/T	T/T	T/T	T/T	T/T	T/T	T/T	T/T	T/T	T/T	T/T	T/T	T/T	T/T	T/T	T/T	T/T	T/T	T/T	T/T	T/T	C/C	T/T	T/C	T/T	C/C	T/T	T/T	T/T	T/T	T/T	T/T	T/T	T/T	T/T	T/T
933831	A	C	ANN=C|intergenic_region|MODIFIER|YPR196W-YPR197C|YPR196W-YPR197C|intergenic_region|YPR196W-YPR197C|||||||||	A/A	A/A	A/A	A/A	A/A	A/A	A/A	C/C	A/A	A/A	A/A	A/A	A/A	A/A	A/A	A/A	A/A	A/A	A/A	A/A	A/A	A/A	A/A	A/A	A/A	A/A	A/A	A/A	A/A	A/A	A/A	A/A	A/A	A/A	A/A	A/A	A/A	A/A	A/A	C/C	A/A	A/A	A/A	A/A	A/A	A/A
933868	C	A	ANN=A|intergenic_region|MODIFIER|YPR196W-YPR197C|YPR196W-YPR197C|intergenic_region|YPR196W-YPR197C|||||||||	C/C	C/C	C/C	C/C	C/C	C/C	C/C	C/C	C/C	C/A	C/C	C/C	C/C	C/C	C/C	C/C	C/C	C/C	C/C	C/C	C/C	C/C	C/C	C/C	C/C	C/C	C/C	C/C	C/C	C/C	C/C	C/C	C/C	C/A	C/C	C/C	C/C	C/C	C/C	C/C	C/C	C/C	C/C	C/C	C/A	C/C
933883	C	T	ANN=T|intergenic_region|MODIFIER|YPR196W-YPR197C|YPR196W-YPR197C|intergenic_region|YPR196W-YPR197C|||||||||	C/C	C/C	C/C	C/C	C/C	C/C	C/C	C/C	C/C	C/C	C/C	C/C	C/C	C/C	C/C	C/C	C/C	C/C	C/C	C/C	C/C	C/C	C/C	C/C	C/C	C/C	C/C	C/C	C/C	C/C	C/C	C/C	C/C	C/C	C/C	C/C	C/C	C/C	C/C	C/C	C/C	C/C	C/C	C/C	C/C	C/C
933923	C	T	ANN=T|missense_variant|MODERATE|YPR197C|YPR197C|transcript|YPR197C|protein_coding|1/1|c.539G>A|p.Ser180Asn|539/564|539/564|180/187||	C/C	C/C	C/C	C/C	C/C	C/C	C/C	C/C	C/C	C/C	C/C	C/C	C/C	C/C	C/C	C/C	C/C	C/C	C/C	C/C	C/C	C/C	C/C	C/C	C/C	C/C	C/C	C/C	C/C	C/C	C/C	C/C	C/C	C/C	C/C	C/C	C/C	C/C	C/C	C/C	C/C	C/C	C/C	C/C	C/C	C/C
933925	T	A	ANN=A|synonymous_variant|LOW|YPR197C|YPR197C|transcript|YPR197C|protein_coding|1/1|c.537A>T|p.Arg179Arg|537/564|537/564|179/187||	T/T	T/T	T/T	T/T	T/T	T/T	T/T	T/T	T/T	T/T	T/T	T/T	T/T	T/T	T/T	T/T	T/T	T/T	T/T	T/T	T/T	T/T	T/T	T/T	T/T	T/T	T/T	T/T	T/T	T/T	T/T	T/T	T/T	T/T	T/T	T/T	T/T	T/T	T/T	T/T	T/T	T/T	T/T	T/T	T/T	T/T
933940	A	T	ANN=T|stop_gained|HIGH|YPR197C|YPR197C|transcript|YPR197C|protein_coding|1/1|c.522T>A|p.Cys174*|522/564|522/564|174/187||	A/A	A/A	A/A	A/A	A/A	A/A	T/T	A/A	A/A	A/A	A/A	A/A	A/A	A/A	A/A	A/A	A/A	A/A	A/A	A/A	A/A	A/A	A/A	A/A	A/A	A/A	A/A	A/A	A/A	A/A	A/A	A/A	A/A	A/A	A/A	A/A	A/A	A/A	A/A	A/A	A/A	A/A	A/A	A/A	A/A	A/A
934019	T	C	ANN=C|missense_variant|MODERATE|YPR197C|YPR197C|transcript|YPR197C|protein_coding|1/1|c.443A>G|p.Asp148Gly|443/564|443/564|148/187||	T/T	T/T	T/T	T/T	T/T	T/T	T/T	T/T	T/T	T/T	T/T	T/T	T/T	T/T	T/T	T/T	T/T	T/T	T/T	T/T	T/T	T/T	T/T	T/T	T/T	T/T	T/T	T/T	T/T	T/T	T/T	T/T	T/T	T/T	T/T	T/T	T/T	T/T	T/T	T/T	T/T	T/T	T/T	T/T	T/T	T/T
934037	A	G	ANN=G|missense_variant|MODERATE|YPR197C|YPR197C|transcript|YPR197C|protein_coding|1/1|c.425T>C|p.Phe142Ser|425/564|425/564|142/187||,G|missense_variant|MODERATE|SGE1|YPR198W|transcript|YPR198W|protein_coding|1/1|c.4A>G|p.Lys2Glu|4/1632|4/1632|2/543||	A/A	A/A	A/A	A/A	A/A	A/A	A/A	A/A	A/A	A/A	A/A	A/A	A/A	A/A	A/A	A/A	A/A	A/A	A/A	A/A	A/A	A/A	A/A	A/A	A/A	A/A	A/A	A/A	A/A	A/A	A/A	A/A	A/A	A/A	A/A	G/G	A/A	A/A	A/A	A/A	A/A	A/A	A/A	A/A	A/A	A/A
934043	A	G	ANN=G|missense_variant|MODERATE|YPR197C|YPR197C|transcript|YPR197C|protein_coding|1/1|c.419T>C|p.Val140Ala|419/564|419/564|140/187||,G|missense_variant|MODERATE|SGE1|YPR198W|transcript|YPR198W|protein_coding|1/1|c.10A>G|p.Thr4Ala|10/1632|10/1632|4/543||	A/A	A/A	A/A	A/A	A/A	A/A	A/A	A/A	A/A	A/A	A/A	A/A	A/A	A/A	A/A	A/A	A/A	A/A	A/A	A/A	A/A	A/A	A/A	A/A	A/A	A/A	A/A	A/A	A/A	A/A	A/A	A/A	A/A	A/A	A/A	A/A	A/A	A/A	A/A	A/A	A/A	A/A	G/G	A/A	A/A	A/A
934070	T	C	ANN=C|missense_variant|MODERATE|YPR197C|YPR197C|transcript|YPR197C|protein_coding|1/1|c.392A>G|p.Asp131Gly|392/564|392/564|131/187||,C|missense_variant|MODERATE|SGE1|YPR198W|transcript|YPR198W|protein_coding|1/1|c.37T>C|p.Ser13Pro|37/1632|37/1632|13/543||	T/T	T/T	T/T	T/T	T/T	T/T	T/T	T/T	T/T	T/T	T/T	T/T	T/T	T/T	T/T	T/T	T/T	T/T	T/T	T/T	T/T	T/T	T/T	T/T	T/T	T/T	T/T	T/T	T/T	T/T	T/T	T/T	T/T	T/T	T/T	T/T	T/T	T/T	T/T	T/T	T/T	T/T	T/T	T/T	T/T	T/T
934115	G	A	ANN=A|missense_variant|MODERATE|YPR197C|YPR197C|transcript|YPR197C|protein_coding|1/1|c.347C>T|p.Thr116Ile|347/564|347/564|116/187||,A|missense_variant|MODERATE|SGE1|YPR198W|transcript|YPR198W|protein_coding|1/1|c.82G>A|p.Val28Met|82/1632|82/1632|28/543||	G/G	G/G	G/G	G/G	G/G	G/G	G/G	G/G	G/G	G/A	G/G	G/G	G/G	G/G	G/G	G/G	G/G	G/G	G/G	G/G	G/G	G/G	G/G	G/G	G/G	G/G	G/G	G/G	G/G	G/G	G/G	G/G	G/G	G/G	G/G	G/G	G/G	G/G	G/G	A/A	G/G	G/G	G/G	G/G	G/G	G/G
934175	T	C	ANN=C|missense_variant|MODERATE|YPR197C|YPR197C|transcript|YPR197C|protein_coding|1/1|c.287A>G|p.Asn96Ser|287/564|287/564|96/187||,C|synonymous_variant|LOW|SGE1|YPR198W|transcript|YPR198W|protein_coding|1/1|c.142T>C|p.Leu48Leu|142/1632|142/1632|48/543||	T/T	T/T	T/T	T/T	T/T	T/T	T/T	C/C	T/T	T/T	T/T	T/T	T/T	T/T	T/T	T/T	T/T	T/T	T/T	T/T	T/T	T/T	T/T	T/T	T/T	T/T	T/T	T/T	T/T	T/T	T/T	T/T	T/T	T/T	T/T	T/T	T/T	T/T	T/T	C/C	T/T	T/T	T/T	T/T	T/T	T/T
934323	C	T	ANN=T|missense_variant|MODERATE|YPR197C|YPR197C|transcript|YPR197C|protein_coding|1/1|c.139G>A|p.Ala47Thr|139/564|139/564|47/187||,T|missense_variant|MODERATE|SGE1|YPR198W|transcript|YPR198W|protein_coding|1/1|c.290C>T|p.Ala97Val|290/1632|290/1632|97/543||	C/C	C/C	C/C	C/C	C/C	C/C	C/C	C/C	C/C	C/C	C/C	C/C	C/C	C/C	C/C	C/C	C/C	C/C	C/C	C/C	C/C	C/C	C/C	C/C	C/C	C/C	C/C	C/C	C/C	C/C	C/C	C/C	C/C	C/C	C/C	C/C	C/C	C/C	C/C	C/C	C/C	C/C	C/C	C/C	C/C	C/C
934324	G	C	ANN=C|synonymous_variant|LOW|YPR197C|YPR197C|transcript|YPR197C|protein_coding|1/1|c.138C>G|p.Val46Val|138/564|138/564|46/187||,C|synonymous_variant|LOW|SGE1|YPR198W|transcript|YPR198W|protein_coding|1/1|c.291G>C|p.Ala97Ala|291/1632|291/1632|97/543||	G/G	G/G	G/G	G/G	G/G	G/G	G/G	G/G	G/G	G/G	G/G	G/G	G/G	G/G	G/G	G/G	G/G	G/G	G/G	G/G	G/G	G/G	G/G	G/G	G/G	G/G	G/G	G/G	G/G	G/G	G/G	G/G	G/G	G/G	G/G	G/G	G/G	G/G	G/G	G/G	G/G	G/G	G/G	G/G	G/G	G/G
934426	A	G	ANN=G|synonymous_variant|LOW|YPR197C|YPR197C|transcript|YPR197C|protein_coding|1/1|c.36T>C|p.Ile12Ile|36/564|36/564|12/187||,G|synonymous_variant|LOW|SGE1|YPR198W|transcript|YPR198W|protein_coding|1/1|c.393A>G|p.Gly131Gly|393/1632|393/1632|131/543||	A/A	A/A	A/A	A/A	A/A	A/A	A/A	A/A	A/A	A/A	A/A	G/G	A/A	A/A	A/A	A/A	A/A	A/A	A/A	A/A	A/A	A/A	A/A	A/A	A/A	A/A	A/A	A/A	A/A	A/A	A/A	A/A	A/A	A/A	A/A	A/A	A/A	G/G	A/A	A/A	A/A	A/A	A/A	A/A	A/A	A/A
934444	C	T	ANN=T|synonymous_variant|LOW|YPR197C|YPR197C|transcript|YPR197C|protein_coding|1/1|c.18G>A|p.Ala6Ala|18/564|18/564|6/187||,T|synonymous_variant|LOW|SGE1|YPR198W|transcript|YPR198W|protein_coding|1/1|c.411C>T|p.Leu137Leu|411/1632|411/1632|137/543||	C/C	C/C	C/C	C/C	C/C	C/C	C/C	T/T	C/C	C/C	C/C	C/C	C/C	C/C	C/C	C/C	C/C	C/C	C/C	C/C	C/C	C/C	C/C	C/C	C/C	C/C	C/C	C/C	C/C	C/C	C/C	C/C	C/C	C/C	C/C	C/C	C/C	C/C	C/C	T/T	C/C	C/C	C/C	C/C	C/C	C/C
934493	G	A	ANN=A|missense_variant|MODERATE|SGE1|YPR198W|transcript|YPR198W|protein_coding|1/1|c.460G>A|p.Ala154Thr|460/1632|460/1632|154/543||	G/G	G/G	G/G	G/G	G/G	G/G	G/G	G/G	G/G	G/G	G/G	G/G	G/G	G/G	G/G	G/G	G/G	G/G	G/G	G/G	G/G	G/G	G/G	G/G	G/G	G/G	G/G	G/G	G/G	G/G	G/G	G/G	G/G	G/G	G/G	G/G	G/G	G/G	G/G	G/G	G/G	G/G	G/G	G/G	G/G	G/G
934510	G	T	ANN=T|missense_variant|MODERATE|SGE1|YPR198W|transcript|YPR198W|protein_coding|1/1|c.477G>T|p.Leu159Phe|477/1632|477/1632|159/543||	G/G	G/G	G/G	G/G	G/G	G/G	G/G	G/G	G/G	G/G	G/G	G/G	G/G	G/G	G/G	G/G	G/G	G/G	G/G	G/G	G/G	G/G	G/G	G/G	G/G	G/G	G/G	G/G	G/G	G/G	G/G	G/G	G/G	G/G	G/G	G/G	G/G	G/G	G/G	G/G	G/G	G/G	G/G	G/G	G/G	G/G
934546	C	A,T	ANN=A|synonymous_variant|LOW|SGE1|YPR198W|transcript|YPR198W|protein_coding|1/1|c.513C>A|p.Ile171Ile|513/1632|513/1632|171/543||,T|synonymous_variant|LOW|SGE1|YPR198W|transcript|YPR198W|protein_coding|1/1|c.513C>T|p.Ile171Ile|513/1632|513/1632|171/543||	C/C	C/C	C/C	C/C	C/C	C/C	C/C	T/T	C/C	C/C	C/C	C/C	C/C	C/C	C/C	C/C	C/C	C/C	C/C	C/C	C/C	C/C	C/C	C/C	C/C	C/C	C/C	C/C	C/C	C/C	C/C	C/C	C/C	C/C	C/C	C/C	C/C	C/C	C/C	T/T	C/C	C/C	C/C	C/C	C/C	C/C
934582	C	T	ANN=T|synonymous_variant|LOW|SGE1|YPR198W|transcript|YPR198W|protein_coding|1/1|c.549C>T|p.Asn183Asn|549/1632|549/1632|183/543||	C/T	T/T	C/C	C/C	C/C	C/C	C/C	T/T	C/C	T/T	C/C	C/C	T/T	T/T	T/T	T/T	C/C	C/C	C/C	C/C	C/C	C/C	T/T	T/T	T/T	T/T	T/T	T/T	C/C	C/C	C/C	T/T	C/T	C/T	C/C	T/T	T/T	C/C	C/C	T/T	C/C	C/C	C/C	T/T	T/T	T/T
934649	T	C	ANN=C|missense_variant|MODERATE|SGE1|YPR198W|transcript|YPR198W|protein_coding|1/1|c.616T>C|p.Tyr206His|616/1632|616/1632|206/543||	T/T	T/T	T/T	T/T	T/T	T/T	T/T	T/T	T/T	T/T	T/T	T/T	T/T	T/T	T/T	T/T	T/T	T/T	T/T	T/T	T/T	T/T	T/T	T/T	T/T	T/T	T/T	T/T	T/T	T/T	T/T	T/T	T/T	T/T	T/T	T/T	T/T	T/T	T/T	T/T	T/T	T/T	T/T	T/T	T/T	T/T
934671	G	A	ANN=A|missense_variant|MODERATE|SGE1|YPR198W|transcript|YPR198W|protein_coding|1/1|c.638G>A|p.Ser213Asn|638/1632|638/1632|213/543||	G/G	G/G	G/G	G/G	G/G	G/G	G/G	G/G	G/G	G/G	G/G	G/G	G/G	G/G	G/G	G/G	G/G	G/G	G/G	G/G	G/G	G/G	G/G	G/G	G/G	G/G	G/G	G/G	G/G	G/G	G/G	G/G	G/G	G/G	G/G	G/G	G/G	G/G	G/G	G/G	G/G	G/G	G/G	G/G	G/G	G/G
934693	A	G	ANN=G|synonymous_variant|LOW|SGE1|YPR198W|transcript|YPR198W|protein_coding|1/1|c.660A>G|p.Glu220Glu|660/1632|660/1632|220/543||	A/A	A/A	A/A	A/A	A/A	A/A	A/A	A/A	A/A	A/A	A/A	A/A	A/A	A/A	A/A	A/A	A/A	A/A	A/A	A/A	A/A	A/A	A/A	G/G	G/G	G/G	A/A	A/A	A/A	A/A	A/A	A/A	A/A	A/A	A/A	G/G	A/A	A/A	A/A	A/A	A/A	A/A	A/A	A/A	A/A	A/A
934720	T	G	ANN=G|synonymous_variant|LOW|SGE1|YPR198W|transcript|YPR198W|protein_coding|1/1|c.687T>G|p.Val229Val|687/1632|687/1632|229/543||	T/T	T/T	T/T	T/T	T/T	T/T	T/T	T/T	T/T	T/T	T/T	T/T	T/T	T/T	T/T	T/T	T/T	T/T	T/T	T/T	T/T	T/T	T/T	T/T	T/T	T/T	T/T	T/T	T/T	T/T	T/T	T/T	T/T	T/T	T/T	T/T	T/T	T/T	T/T	T/T	T/T	T/T	T/T	T/T	T/T	T/T
934730	T	C	ANN=C|synonymous_variant|LOW|SGE1|YPR198W|transcript|YPR198W|protein_coding|1/1|c.697T>C|p.Leu233Leu|697/1632|697/1632|233/543||	T/T	T/T	T/T	T/T	T/T	T/T	T/T	T/T	T/T	T/T	T/T	T/T	T/T	T/T	T/T	T/T	T/T	T/T	T/T	T/T	T/T	T/T	T/T	T/T	T/T	T/T	T/T	T/T	T/T	T/T	T/T	T/T	T/T	T/T	T/T	T/T	T/T	T/T	T/T	T/T	T/T	T/T	T/T	T/T	T/T	T/T
934734	C	G	ANN=G|missense_variant|MODERATE|SGE1|YPR198W|transcript|YPR198W|protein_coding|1/1|c.701C>G|p.Ser234Cys|701/1632|701/1632|234/543||	C/C	C/C	C/C	C/C	C/C	C/C	C/C	G/G	C/C	C/C	C/C	C/C	C/C	C/C	C/C	C/C	C/C	C/C	C/C	C/C	C/C	C/C	C/C	C/C	C/C	C/C	C/C	C/C	C/C	C/C	C/C	C/C	C/C	C/C	C/C	C/C	C/C	C/C	C/C	C/C	C/C	C/C	C/C	C/C	C/C	C/C
934774	T	C	ANN=C|synonymous_variant|LOW|SGE1|YPR198W|transcript|YPR198W|protein_coding|1/1|c.741T>C|p.Phe247Phe|741/1632|741/1632|247/543||	T/T	T/T	T/T	T/T	T/T	T/T	T/T	T/T	T/T	T/T	T/T	T/T	T/T	T/T	T/T	T/T	T/T	T/T	T/T	T/T	T/T	T/T	T/T	T/T	T/T	T/T	T/T	T/T	T/T	T/T	T/T	T/T	T/T	T/T	T/T	T/T	T/T	T/T	T/T	T/T	T/T	T/T	T/T	T/T	T/T	T/T
934790	C	G	ANN=G|missense_variant|MODERATE|SGE1|YPR198W|transcript|YPR198W|protein_coding|1/1|c.757C>G|p.Pro253Ala|757/1632|757/1632|253/543||	C/C	C/C	C/C	C/C	C/C	C/C	C/C	C/C	C/C	C/C	C/C	C/C	C/C	C/C	C/C	C/C	C/C	C/C	C/C	C/C	C/C	C/C	C/C	C/C	C/C	C/C	C/C	C/C	C/C	C/C	C/C	C/C	C/C	C/C	C/C	C/C	C/C	C/C	C/C	C/C	C/C	C/C	C/C	C/C	C/C	C/C
934801	G	A	ANN=A|synonymous_variant|LOW|SGE1|YPR198W|transcript|YPR198W|protein_coding|1/1|c.768G>A|p.Ser256Ser|768/1632|768/1632|256/543||	G/A	A/A	G/G	G/G	G/G	G/G	G/G	A/A	G/G	A/A	G/G	G/G	A/A	A/A	A/A	A/A	G/G	G/G	G/G	A/A	G/G	G/G	A/A	G/A	A/A	A/A	A/A	A/A	G/G	G/G	G/G	A/A	G/A	G/A	G/G	A/A	A/A	G/G	G/G	A/A	G/G	G/G	G/G	A/A	A/A	A/A
934842	T	C	ANN=C|missense_variant|MODERATE|SGE1|YPR198W|transcript|YPR198W|protein_coding|1/1|c.809T>C|p.Leu270Ser|809/1632|809/1632|270/543||	T/T	T/T	T/T	T/T	T/T	T/T	T/T	T/T	T/T	T/T	T/T	T/T	T/T	T/T	T/T	T/T	T/T	T/T	T/T	T/T	T/T	T/T	T/T	T/T	T/T	T/T	T/T	T/T	T/T	T/T	T/T	T/T	T/T	T/T	T/T	T/T	T/T	T/T	T/T	T/T	T/T	T/T	T/T	T/T	T/T	T/T
934877	T	C	ANN=C|missense_variant|MODERATE|SGE1|YPR198W|transcript|YPR198W|protein_coding|1/1|c.844T>C|p.Ser282Pro|844/1632|844/1632|282/543||	C/C*	C/C*	T/T	T/T	T/T*	T/T*	C/C	C/C*	T/T*	C/C	C/C	C/C*	C/C	C/C	C/C*	C/C	T/T	T/T	T/T*	C/C*	T/T*	T/T	C/C*	C/C*	C/C*	C/C*	C/C*	C/C*	T/T*	T/T	T/T*	C/C	C/C*	T/C; C*	T/T	C/C	C/C	C/C	T/T	C/C	C/C	T/T	T/T	C/C	C/C	C/C
934884	C	T	ANN=T|missense_variant|MODERATE|SGE1|YPR198W|transcript|YPR198W|protein_coding|1/1|c.851C>T|p.Ser284Leu|851/1632|851/1632|284/543||	T/T*	T/T*	T/T	C/C	C/C*	T/T*	T/T	T/T*	T/T*	T/T	T/T	T/T*	T/T	T/T	T/T*	T/T	C/C	T/T	C/C*	T/T*	C/C*	T/T	T/T*	T/T*	T/T*	T/T*	T/T*	T/T*	C/C*	C/C	T/T*	T/T	T/T*	C/T; T*	T/T	T/T	T/T	T/T	T/T	T/T	T/T	T/T	C/C	T/T	T/T	T/T
934894	C	T	ANN=T|synonymous_variant|LOW|SGE1|YPR198W|transcript|YPR198W|protein_coding|1/1|c.861C>T|p.His287His|861/1632|861/1632|287/543||	C/C	C/C	C/C	T/T	C/C	C/C	T/T	C/C	C/C	C/C	C/C	C/C	C/C	C/C	C/C	C/C	C/C	C/C	C/C	C/C	C/C	C/C	C/C	C/C	C/C	C/C	C/C	C/C	C/C	C/C	C/C	C/C	C/C	C/C	C/C	C/C	C/C	C/C	C/C	C/C	C/C	C/C	C/C	C/C	C/C	C/C
934922	C	A	ANN=A|missense_variant|MODERATE|SGE1|YPR198W|transcript|YPR198W|protein_coding|1/1|c.889C>A|p.Leu297Met|889/1632|889/1632|297/543||	C/C	C/C	C/C	C/C	C/C	C/C	A/A	C/C	C/C	C/C	C/C	C/C	C/C	C/C	C/C	C/C	C/C	C/C	C/C	C/C	C/C	C/C	C/C	C/C	C/C	C/C	C/C	C/C	C/C	C/C	C/C	C/C	C/C	C/C	C/C	C/C	C/C	C/C	C/C	C/C	C/C	C/C	C/C	C/C	C/C	C/C
934948	T	C	ANN=C|synonymous_variant|LOW|SGE1|YPR198W|transcript|YPR198W|protein_coding|1/1|c.915T>C|p.Cys305Cys|915/1632|915/1632|305/543||	T/T	T/T	T/T	T/T	T/T	T/T	T/T	T/T	T/T	T/T	T/T	T/T	T/T	T/T	T/T	T/T	T/T	T/T	T/T	T/T	T/T	T/T	T/T	T/T	T/T	T/T	T/T	T/T	T/T	T/T	T/T	T/T	T/T	T/T	T/T	T/T	T/T	T/T	T/T	T/T	T/T	T/T	T/T	T/T	T/T	T/T
934997	G	C	ANN=C|missense_variant|MODERATE|SGE1|YPR198W|transcript|YPR198W|protein_coding|1/1|c.964G>C|p.Glu322Gln|964/1632|964/1632|322/543||	G/G	G/G	G/G	G/G	G/G	G/G	G/G	G/G	G/G	G/G	G/G	G/G	G/G	G/G	G/G	G/G	G/G	G/G	G/G	C/C	G/G	G/G	G/G	G/G	G/G	G/G	G/G	G/G	G/G	G/G	G/G	G/G	G/G	G/G	G/G	G/G	G/G	G/G	G/G	C/C	G/G	G/G	G/G	G/G	G/G	G/G
935010	C	T	ANN=T|missense_variant|MODERATE|SGE1|YPR198W|transcript|YPR198W|protein_coding|1/1|c.977C>T|p.Ala326Val|977/1632|977/1632|326/543||	C/C	C/C	C/C	C/C	C/C	C/C	C/C	C/C	C/C	C/C	C/C	C/C	C/C	C/C	C/C	C/C	C/C	C/C	C/C	C/C	C/C	C/C	C/C	C/C	C/C	C/C	C/C	C/C	C/C	C/C	C/C	C/C	C/C	C/C	C/C	C/C	C/C	C/C	C/C	C/C	C/C	C/C	C/C	C/C	C/C	C/C
935086	A	G	ANN=G|synonymous_variant|LOW|SGE1|YPR198W|transcript|YPR198W|protein_coding|1/1|c.1053A>G|p.Ser351Ser|1053/1632|1053/1632|351/543||	A/A	A/A	A/A	A/A	A/A	A/A	A/A	A/A	A/A	A/A	A/A	A/A	A/A	A/A	A/A	A/A	A/A	A/A	A/A	A/A	A/A	A/A	A/A	A/A	A/A	A/A	A/A	A/A	A/A	A/A	A/A	A/A	A/A	A/A	A/A	A/A	A/A	A/A	A/A	A/A	A/A	A/A	A/A	A/A	A/A	A/A
935125	A	G	ANN=G|synonymous_variant|LOW|SGE1|YPR198W|transcript|YPR198W|protein_coding|1/1|c.1092A>G|p.Leu364Leu|1092/1632|1092/1632|364/543||	A/G	A/G	A/A	G/G	G/G	A/A	A/A	G/G	A/A	G/G	A/A	A/A	G/G	G/G	G/G	G/G	G/G	A/A	G/G	G/G	G/G	A/A	G/G	G/G	G/G	G/G	G/G	G/G	A/A	G/G	A/A	G/G	A/G	A/G	A/A	G/G	G/G	A/A	A/A	G/G	A/A	A/A	A/A	G/G	G/G	G/G
935140	C	G	ANN=G|synonymous_variant|LOW|SGE1|YPR198W|transcript|YPR198W|protein_coding|1/1|c.1107C>G|p.Gly369Gly|1107/1632|1107/1632|369/543||	G/G	G/G	C/C	C/C	C/C	C/C	G/G	G/G	C/C	G/G	G/G	G/G	G/G	G/G	G/G	G/G	C/C	C/C	C/C	G/G	C/C	C/C	G/G	G/G	G/G	G/G	G/G	G/G	C/C	C/C	C/C	G/G	G/G	C/G	C/C	G/G	G/G	G/G	C/C	G/G	G/G	C/C	C/C	G/G	G/G	G/G
935141	A	G	ANN=G|missense_variant|MODERATE|SGE1|YPR198W|transcript|YPR198W|protein_coding|1/1|c.1108A>G|p.Ile370Val|1108/1632|1108/1632|370/543||	A/A	A/A	A/A	A/A	A/A	A/A	A/A	A/A	A/A	A/A	A/A	A/A	A/A	A/A	A/A	A/A	A/A	A/A	A/A	A/A	A/A	A/A	A/A	A/A	A/A	A/A	A/A	A/A	A/A	A/A	A/A	A/A	A/A	A/A	A/A	G/G	A/A	A/A	A/A	A/A	A/A	A/A	A/A	A/A	A/A	A/A
935143	C	T	ANN=T|synonymous_variant|LOW|SGE1|YPR198W|transcript|YPR198W|protein_coding|1/1|c.1110C>T|p.Ile370Ile|1110/1632|1110/1632|370/543||	C/T	C/T	C/C	C/C	C/C	C/C	C/C	T/T	C/C	T/T	C/C	C/C	T/T	T/T	T/T	T/T	C/C	C/C	C/C	T/T	C/C	C/C	T/T	C/C	C/C	C/C	T/T	T/T	C/C	C/C	C/C	T/T	C/T	C/T	C/C	C/C	T/T	C/C	C/C	T/T	C/C	C/C	C/C	T/T	T/T	T/T
935148	A	T	ANN=T|missense_variant|MODERATE|SGE1|YPR198W|transcript|YPR198W|protein_coding|1/1|c.1115A>T|p.Lys372Ile|1115/1632|1115/1632|372/543||	A/A	A/A	A/A	A/A	A/A	A/A	A/A	A/A	A/A	A/A	A/A	A/A	A/A	A/A	A/A	A/A	A/A	A/A	A/A	A/A	A/A	A/A	A/A	A/A	A/A	A/A	A/A	A/A	A/A	A/A	A/A	A/A	A/A	A/A	A/A	A/A	A/A	A/A	A/A	A/A	A/A	A/A	A/A	A/A	A/A	A/A
935158	T	C	ANN=C|synonymous_variant|LOW|SGE1|YPR198W|transcript|YPR198W|protein_coding|1/1|c.1125T>C|p.Ile375Ile|1125/1632|1125/1632|375/543||	T/T	T/T	T/T	T/T	T/T	T/T	T/T	T/T	T/T	T/T	T/T	T/T	T/T	T/T	T/T	T/T	T/T	T/T	T/T	T/T	T/T	T/T	T/T	T/T	T/T	T/T	T/T	T/T	T/T	T/T	T/T	C/C	T/T	T/C	T/T	T/T	C/C	T/T	T/T	T/T	T/T	T/T	T/T	T/T	T/T	T/T
935183	G	A	ANN=A|missense_variant|MODERATE|SGE1|YPR198W|transcript|YPR198W|protein_coding|1/1|c.1150G>A|p.Val384Ile|1150/1632|1150/1632|384/543||	G/G	G/G	G/G	G/G	G/G	G/G	G/G	A/A	G/G	G/G	G/G	G/G	G/G	G/G	G/G	G/G	G/G	G/G	G/G	G/G	G/G	G/G	G/G	G/G	G/G	G/G	G/G	G/G	G/G	G/G	G/G	G/G	G/G	G/G	G/G	G/G	G/G	G/G	G/G	G/G	G/G	G/G	G/G	G/G	G/G	G/G
935215	C	A	ANN=A|synonymous_variant|LOW|SGE1|YPR198W|transcript|YPR198W|protein_coding|1/1|c.1182C>A|p.Gly394Gly|1182/1632|1182/1632|394/543||	A/A	A/A	C/C	C/C	C/C	C/C	A/A	A/A	C/C	A/A	A/A	A/A	A/A	A/A	A/A	A/A	C/C	C/C	C/C	A/A	C/C	C/C	A/A	C/A	A/A	A/A	A/A	A/A	C/C	C/C	C/C	A/A	A/A	C/A	C/C	A/A	A/A	A/A	C/C	A/A	A/A	C/C	C/C	A/A	A/A	A/A
935248	C	T	ANN=T|synonymous_variant|LOW|SGE1|YPR198W|transcript|YPR198W|protein_coding|1/1|c.1215C>T|p.Leu405Leu|1215/1632|1215/1632|405/543||	C/C	C/C	C/C	C/C	C/C	C/C	C/C	C/C	C/C	C/C	C/C	C/C	C/C	C/C	C/C	C/C	C/C	C/C	C/C	C/C	C/C	C/C	C/C	C/C	C/C	C/C	C/C	C/C	C/C	C/C	C/C	C/C	C/C	C/C	C/C	C/C	C/C	C/C	C/C	C/C	C/C	C/C	C/C	C/C	C/C	C/C
935251	A	T	ANN=T|synonymous_variant|LOW|SGE1|YPR198W|transcript|YPR198W|protein_coding|1/1|c.1218A>T|p.Pro406Pro|1218/1632|1218/1632|406/543||	T/T	T/T	T/T	T/T	T/T	T/T	T/T	T/T	T/T	T/T	T/T	T/T	T/T	T/T	T/T	T/T	T/T	T/T	T/T	T/T	T/T	T/T	T/T	T/T	T/T	T/T	T/T	T/T	A/A	T/T	T/T	T/T	T/T	T/T	T/T	T/T	T/T	T/T	T/T	T/T	T/T	T/T	A/A	T/T	T/T	T/T
935301	T	C	ANN=C|missense_variant|MODERATE|SGE1|YPR198W|transcript|YPR198W|protein_coding|1/1|c.1268T>C|p.Val423Ala|1268/1632|1268/1632|423/543||	T/T	T/T	T/T	T/T	T/T	T/T	T/T	T/T	T/T	T/T	T/T	T/T	C/C	T/T	T/T	T/T	T/T	T/T	T/T	T/T	T/T	T/T	C/C	T/T	T/T	T/T	T/T	T/T	T/T	T/T	T/T	T/T	T/T	T/T	T/T	T/T	T/T	T/T	T/T	T/T	T/T	T/T	T/T	T/T	T/T	T/T
935320	T	G	ANN=G|missense_variant|MODERATE|SGE1|YPR198W|transcript|YPR198W|protein_coding|1/1|c.1287T>G|p.Asp429Glu|1287/1632|1287/1632|429/543||	T/G	T/G; T*	T/T	T/T	T/T	T/T	T/T	T/T	T/T	G/G	T/T	T/T	T/T	G/G	G/G	G/G	T/T	T/T	T/T	T/T	T/T	T/T	T/T	T/T	T/T	T/T	T/T	G/G	T/T	T/T	T/T	G/G	T/G	T/G	T/T	T/T	G/G	T/T	T/T	T/T	T/T	T/T	T/T	G/G	G/G	G/G
935378	T	A	ANN=A|missense_variant|MODERATE|SGE1|YPR198W|transcript|YPR198W|protein_coding|1/1|c.1345T>A|p.Leu449Met|1345/1632|1345/1632|449/543||	T/A	T/T	T/T	T/T	T/T	T/T	T/T	T/T	T/T	T/T	T/T	T/T	T/T	T/T	T/T	T/T	T/T	T/T	T/T	T/T	T/T	T/T	T/T	T/T	T/T	T/T	T/T	T/T	T/T	T/T	T/T	T/T	T/A	T/T	T/T	T/T	T/T	T/T	T/T	T/T	T/T	T/T	T/T	T/T	T/T	T/T
935432	A	G	ANN=G|missense_variant|MODERATE|SGE1|YPR198W|transcript|YPR198W|protein_coding|1/1|c.1399A>G|p.Lys467Glu|1399/1632|1399/1632|467/543||	A/A	A/A	A/A	A/A	A/A	A/A	A/A	G/G	A/A	A/A	A/A	A/A	A/A	A/A	A/A	A/A	A/A	A/A	A/A	G/G	A/A	A/A	A/A	A/A	A/A	A/A	A/A	A/A	A/A	A/A	A/A	A/A	A/A	A/A	A/A	A/A	A/A	A/A	A/A	G/G	A/A	A/A	A/A	A/A	A/A	A/A
935437	C	T	ANN=T|synonymous_variant|LOW|SGE1|YPR198W|transcript|YPR198W|protein_coding|1/1|c.1404C>T|p.Asn468Asn|1404/1632|1404/1632|468/543||	C/C	C/C	C/C	C/C	C/C	C/C	C/C	C/C	C/C	C/C	C/C	C/C	C/C	C/C	C/C	C/C	C/C	C/C	C/C	C/C	C/C	C/C	C/C	C/C	C/C	C/C	C/C	C/C	C/C	C/C	C/C	C/C	C/C	C/C	C/C	C/C	C/C	C/C	C/C	C/C	C/C	C/C	C/C	C/C	C/C	C/C
935458	A	G	ANN=G|synonymous_variant|LOW|SGE1|YPR198W|transcript|YPR198W|protein_coding|1/1|c.1425A>G|p.Leu475Leu|1425/1632|1425/1632|475/543||	A/A	A/A	A/A	A/A	A/A	A/A	A/A	A/A	A/A	A/A	A/A	A/A	A/A	A/A	A/A	A/A	A/A	A/A	A/A	A/A	A/A	A/A	A/A	G/G	G/G	G/G	A/A	A/A	A/A	A/A	A/A	A/A	A/A	A/A	A/A	G/G	A/A	A/A	A/A	A/A	A/A	A/A	A/A	A/A	A/A	A/A
935470	A	G	ANN=G|synonymous_variant|LOW|SGE1|YPR198W|transcript|YPR198W|protein_coding|1/1|c.1437A>G|p.Gln479Gln|1437/1632|1437/1632|479/543||	A/A	A/A	A/A	A/A	A/A	A/A	G/G	A/A	A/A	A/A	A/A	A/A	A/A	A/A	A/A	A/A	A/A	A/A	A/A	A/A	A/A	A/A	A/A	A/A	A/A	A/A	A/A	A/A	A/A	A/A	A/A	A/A	A/A	A/A	A/A	A/A	A/A	A/A	A/A	A/A	A/A	A/A	A/A	A/A	A/A	A/A
935524	C	T	ANN=T|synonymous_variant|LOW|SGE1|YPR198W|transcript|YPR198W|protein_coding|1/1|c.1491C>T|p.Pro497Pro|1491/1632|1491/1632|497/543||	C/C	C/C	C/C	C/C	C/C	C/C	C/C	C/C	C/C	C/C	C/C	C/C	C/C	C/C	C/C	C/C	C/C	C/C	C/C	C/C	C/C	C/C	C/C	C/C	C/C	C/C	C/C	C/C	C/C	C/C	C/C	C/C	C/C	C/C	C/C	C/C	C/C	C/C	C/C	C/C	C/C	C/C	C/C	C/C	C/C	C/C
935533	A	G	ANN=G|synonymous_variant|LOW|SGE1|YPR198W|transcript|YPR198W|protein_coding|1/1|c.1500A>G|p.Ser500Ser|1500/1632|1500/1632|500/543||	A/A	A/A	A/A	A/A	A/A	A/A	A/A	A/A	A/A	A/A	A/A	A/A	A/A	A/A	A/A	A/A	A/A	A/A	A/A	A/A	A/A	A/A	A/A	A/A	A/A	A/A	A/A	A/A	A/A	A/A	A/A	A/A	A/A	A/A	A/A	A/A	A/A	A/A	A/A	A/A	A/A	A/A	A/A	A/A	A/A	A/A
935539	A	G	ANN=G|synonymous_variant|LOW|SGE1|YPR198W|transcript|YPR198W|protein_coding|1/1|c.1506A>G|p.Ser502Ser|1506/1632|1506/1632|502/543||	A/A	A/A	A/A	A/A	A/A	A/A	A/A	A/A	A/A	A/A	A/A	A/A	A/A	A/A	A/A	A/A	A/A	A/A	A/A	A/A	A/A	A/A	A/A	A/A	A/A	A/A	A/A	A/A	A/A	A/A	A/A	A/A	A/A	A/A	A/A	G/G	A/A	A/A	A/A	A/A	A/A	A/A	A/A	A/A	A/A	A/A
935549	A	G	ANN=G|missense_variant|MODERATE|SGE1|YPR198W|transcript|YPR198W|protein_coding|1/1|c.1516A>G|p.Asn506Asp|1516/1632|1516/1632|506/543||	A/A	A/A	A/A	A/A	A/A	A/A	A/A	A/A	A/A	A/A	A/A	A/A	A/A	A/A	A/A	A/A	A/A	A/A	A/A	A/A	A/A	A/A	A/A	G/G	G/G	G/G	A/A	A/A	A/A	A/A	A/A	A/A	A/A	A/A	A/A	A/A	A/A	A/A	A/A	A/A	A/A	A/A	A/A	A/A	A/A	A/A
935636	A	G	ANN=G|missense_variant|MODERATE|SGE1|YPR198W|transcript|YPR198W|protein_coding|1/1|c.1603A>G|p.Thr535Ala|1603/1632|1603/1632|535/543||	A/A	A/A	A/A	A/A	A/A	A/A	A/A	A/A	A/A	A/A	A/A	A/A	A/A	A/A	A/A	A/A	A/A	A/A	A/A	A/A	A/A	A/A	A/A	A/A	A/A	A/A	A/A	A/A	A/A	A/A	A/A	A/A	A/A	A/A	A/A	A/A	A/A	A/A	A/A	A/A	A/A	A/A	A/A	A/A	A/A	A/A
935664	G	A	ANN=A|splice_region_variant&stop_retained_variant|LOW|SGE1|YPR198W|transcript|YPR198W|protein_coding|1/1|c.1631G>A|p.Ter544Ter|1631/1632|1631/1632|544/543||	G/A	G/G	G/G	G/G	G/G	G/G	G/G	G/G	G/G	G/G	G/G	G/G	G/G	G/G	G/G	G/G	G/G	G/G	G/G	G/G	G/G	G/G	G/G	G/G	G/G	G/G	G/G	G/G	G/G	G/G	G/G	G/G	G/A	G/G	G/G	G/G	G/G	G/G	G/G	G/G	G/G	G/G	G/G	G/G	G/G	A/A
935715	C	A	ANN=A|intergenic_region|MODIFIER|SGE1-ARR1|YPR198W-YPR199C|intergenic_region|YPR198W-YPR199C|||||||||	C/C	C/C	C/C	C/C	C/C	C/C	C/C	A/A	C/C	C/C	C/C	C/C	C/C	C/C	C/C	C/C	C/C	C/C	C/C	A/A	C/C	C/C	C/C	C/C	C/C	C/C	C/C	C/C	C/C	C/C	C/C	C/C	C/C	C/C	C/C	C/C	C/C	C/C	C/C	A/A	C/C	C/C	C/C	C/C	C/C	C/C
935719	A	G	ANN=G|intergenic_region|MODIFIER|SGE1-ARR1|YPR198W-YPR199C|intergenic_region|YPR198W-YPR199C|||||||||	A/A	A/A	A/A	A/A	A/A	A/A	A/A	A/A	A/A	A/A	A/A	G/G	A/A	A/A	A/A	A/A	A/A	A/A	A/A	A/A	A/A	A/A	A/A	A/A	A/A	A/A	A/A	A/A	A/A	A/A	A/A	A/A	A/A	A/A	A/A	A/A	A/A	G/G	A/A	A/A	A/A	A/A	A/A	A/A	A/A	A/A
935728	T	C	ANN=C|intergenic_region|MODIFIER|SGE1-ARR1|YPR198W-YPR199C|intergenic_region|YPR198W-YPR199C|||||||||	T/T	T/T	T/T	T/T	T/T	T/T	T/T	T/T	T/T	T/T	T/T	T/T	T/T	T/T	T/T	T/T	T/T	T/T	T/T	T/T	T/T	T/T	T/T	C/C	C/C	C/C	T/T	T/T	T/T	T/T	T/T	T/T	T/T	T/T	T/T	C/C	T/T	T/T	T/T	T/T	T/T	T/T	T/T	T/T	T/T	T/T
935738	T	C	ANN=C|intergenic_region|MODIFIER|SGE1-ARR1|YPR198W-YPR199C|intergenic_region|YPR198W-YPR199C|||||||||	T/T	T/T	T/T	T/T	T/T	T/T	T/T	T/T	T/T	T/T	T/T	T/T	T/T	T/T	T/T	T/T	T/T	T/T	T/T	T/T	T/T	T/T	T/T	C/C	C/C	C/C	T/T	T/T	T/T	T/T	T/T	T/T	T/T	T/T	T/T	C/C	T/T	T/T	T/T	T/T	T/T	T/T	T/T	T/T	T/T	T/T
935742	A	T	ANN=T|intergenic_region|MODIFIER|SGE1-ARR1|YPR198W-YPR199C|intergenic_region|YPR198W-YPR199C|||||||||	A/A	A/A	A/A	A/A	A/A	A/A	A/A	A/A	A/A	A/A	A/A	A/A	A/A	A/A	A/A	A/A	A/A	A/A	A/A	A/A	A/A	A/A	A/A	A/A	A/A	A/A	A/A	A/A	A/A	A/A	A/A	A/A	A/A	A/A	A/A	A/A	A/A	A/A	A/A	A/A	A/A	A/A	A/A	A/A	A/A	A/A
935768	G	A	ANN=A|intergenic_region|MODIFIER|SGE1-ARR1|YPR198W-YPR199C|intergenic_region|YPR198W-YPR199C|||||||||	G/G	G/G	G/G	G/G	G/G	G/G	G/G	G/G	G/G	G/G	A/A	G/G	G/G	G/G	G/G	G/G	G/G	G/G	G/G	G/G	G/G	G/G	G/G	G/G	G/G	G/G	G/G	G/G	G/G	G/G	G/G	G/G	G/G	G/G	G/G	G/G	G/G	G/G	G/G	G/G	A/A	G/G	G/G	G/G	G/G	G/G
935782	C	T	ANN=T|intergenic_region|MODIFIER|SGE1-ARR1|YPR198W-YPR199C|intergenic_region|YPR198W-YPR199C|||||||||	C/C	C/C	C/C	C/C	C/C	C/C	C/C	C/C	C/C	C/C	C/C	C/C	C/C	C/C	C/C	C/C	C/C	C/C	C/C	C/C	C/C	C/C	C/C	T/T	T/T	T/T	C/C	C/C	C/C	C/C	C/C	C/C	C/C	C/C	C/C	T/T	C/C	C/C	C/C	C/C	C/C	C/C	C/C	C/C	C/C	C/C
935794	T	G	ANN=G|intergenic_region|MODIFIER|SGE1-ARR1|YPR198W-YPR199C|intergenic_region|YPR198W-YPR199C|||||||||	T/T	T/T	T/T	T/T	T/T	T/T	T/T	T/T	T/T	T/T	T/T	T/T	T/T	T/T	T/T	T/T	T/T	T/T	T/T	T/T	T/T	T/T	T/T	T/T	T/T	T/T	T/T	T/T	T/T	T/T	T/T	T/T	T/T	T/T	T/T	T/T	T/T	T/T	T/T	T/T	T/T	T/T	T/T	T/T	T/T	T/T
935797	G	A	ANN=A|intergenic_region|MODIFIER|SGE1-ARR1|YPR198W-YPR199C|intergenic_region|YPR198W-YPR199C|||||||||	G/G	G/G	G/G	G/G	G/G	G/G	G/G	G/G	G/G	G/G	G/G	G/G	G/G	G/G	G/G	G/G	G/G	G/G	G/G	G/G	G/G	G/G	G/G	A/A	A/A	A/A	G/G	G/G	G/G	G/G	G/G	G/G	G/G	G/G	G/G	A/A	G/G	G/G	G/G	G/G	G/G	G/G	G/G	G/G	G/G	G/G
935800	G	T	ANN=T|intergenic_region|MODIFIER|SGE1-ARR1|YPR198W-YPR199C|intergenic_region|YPR198W-YPR199C|||||||||	G/G	G/G	G/G	G/G	G/G	G/G	G/G	G/G	G/G	G/G	G/G	T/T	G/T	G/G	G/G	G/G	G/G	G/G	G/G	G/G	G/G	G/G	G/G	G/G	G/G	G/G	G/G	G/G	G/G	G/G	G/G	G/G	G/G	G/G	G/G	G/G	G/G	T/T	G/G	G/G	G/G	G/G	G/G	G/G	G/G	G/G
935807	G	C	ANN=C|intergenic_region|MODIFIER|SGE1-ARR1|YPR198W-YPR199C|intergenic_region|YPR198W-YPR199C|||||||||	G/C	G/G	G/G	G/G	G/G	G/G	G/G	G/G	G/G	G/G	G/G	G/G	G/G	G/G	G/G	G/G	G/G	G/G	G/G	G/G	G/G	G/G	G/G	G/G	G/G	G/G	G/G	G/G	G/G	G/G	G/G	G/G	G/G	G/G	G/G	G/G	G/G	G/G	G/G	G/G	G/G	G/G	G/G	G/G	G/G	C/C
935811	G	A	ANN=A|intergenic_region|MODIFIER|SGE1-ARR1|YPR198W-YPR199C|intergenic_region|YPR198W-YPR199C|||||||||	G/G	G/G	G/G	G/G	G/G	G/G	G/G	G/G	G/G	G/G	G/G	G/G	G/G	G/G	G/G	G/G	G/G	G/G	G/G	G/G	G/G	G/G	G/G	A/A	G/A	A/A	G/G	G/G	G/G	G/G	G/G	G/G	G/G	G/G	G/G	A/A	G/G	G/G	G/G	G/G	G/G	G/G	G/G	G/G	G/G	G/G
935812	A	G	ANN=G|intergenic_region|MODIFIER|SGE1-ARR1|YPR198W-YPR199C|intergenic_region|YPR198W-YPR199C|||||||||	A/A	A/A	A/A	A/A	A/A	A/A	A/A	A/A	A/A	A/A	A/A	A/A	A/A	A/A	A/A	A/A	A/A	A/A	A/A	A/A	A/A	A/A	A/A	G/G	G/G	G/G	A/A	A/A	A/A	A/A	A/A	A/A	A/A	A/A	A/A	G/G	A/A	A/A	A/A	A/A	A/A	A/A	A/A	A/A	A/A	A/A
935813	T	G	ANN=G|intergenic_region|MODIFIER|SGE1-ARR1|YPR198W-YPR199C|intergenic_region|YPR198W-YPR199C|||||||||	T/T	T/T	T/T	T/T	T/T	T/T	T/T	T/T	T/T	T/T	T/T	T/T	T/T	T/T	T/T	T/T	T/T	T/T	T/T	T/T	T/T	T/T	T/T	T/T	T/T	T/T	T/T	T/T	T/T	T/T	T/T	T/T	T/T	T/T	T/T	T/T	T/T	T/T	T/T	T/T	T/T	T/T	T/T	T/T	T/T	T/T
935815	A	G	ANN=G|intergenic_region|MODIFIER|SGE1-ARR1|YPR198W-YPR199C|intergenic_region|YPR198W-YPR199C|||||||||	A/A	A/A	A/A	A/A	A/A	A/A	A/A	A/A	A/A	A/A	A/A	G/G	A/G	A/A	A/A	A/A	A/A	A/A	A/A	A/A	A/A	A/A	A/A	A/A	A/A	A/A	A/A	A/A	A/A	A/A	A/A	A/A	A/A	A/A	A/A	A/A	A/A	G/G	A/A	A/A	A/A	A/A	A/A	A/A	A/A	A/A
935829	G	T	ANN=T|intergenic_region|MODIFIER|SGE1-ARR1|YPR198W-YPR199C|intergenic_region|YPR198W-YPR199C|||||||||	G/G	G/G	G/G	G/G	G/G	G/G	G/G	G/G	G/G	G/G	G/G	G/G	G/G	G/G	G/G	G/G	G/G	G/G	G/G	G/G	G/G	G/G	G/G	T/T	T/T	T/T	G/G	G/G	G/G	G/G	G/G	G/G	G/G	G/G	G/G	T/T	G/G	G/G	G/G	G/G	G/G	G/G	G/G	G/G	G/G	G/G
935838	G	C	ANN=C|intergenic_region|MODIFIER|SGE1-ARR1|YPR198W-YPR199C|intergenic_region|YPR198W-YPR199C|||||||||	G/G	G/G	G/G	G/G	G/G	G/G	G/G	G/G	G/G	G/G	G/G	G/G	G/G	G/G	G/G	G/G	G/G	G/G	G/G	G/G	G/G	G/G	G/G	G/G	G/G	G/G	G/G	G/G	G/G	G/G	G/G	G/G	G/G	G/G	G/G	G/G	G/G	G/G	G/G	G/G	G/G	C/C	G/G	G/G	G/G	G/G
935870	T	C	ANN=C|intergenic_region|MODIFIER|SGE1-ARR1|YPR198W-YPR199C|intergenic_region|YPR198W-YPR199C|||||||||	T/T	T/T	T/T	T/T	T/T	T/T	T/T	T/T	T/T	T/T	T/T	T/T	T/T	T/T	T/T	T/T	T/T	T/T	T/T	T/T	T/T	T/T	T/T	T/T	T/T	T/T	T/T	T/T	T/T	T/T	T/T	T/T	T/T	T/T	T/T	T/T	T/T	T/T	T/T	T/T	T/T	T/T	T/T	T/T	T/T	T/T
935876	C	A,T	ANN=A|intergenic_region|MODIFIER|SGE1-ARR1|YPR198W-YPR199C|intergenic_region|YPR198W-YPR199C|||||||||,T|intergenic_region|MODIFIER|SGE1-ARR1|YPR198W-YPR199C|intergenic_region|YPR198W-YPR199C|||||||||	C/C	C/C	C/C	C/C	C/C	C/C	C/C	C/C	C/C	C/C	C/C	C/C	C/C	C/C	C/C	C/C	C/C	C/C	C/C	C/C	C/C	C/C	C/C	A,T/A,T	A,T/A,T	A,T/A,T	C/C	C/C	C/C	C/C	C/C	C/C	C/C	C/C	C/C	A,T/A,T	C/C	C/C	C/C	C/C	C/C	C/C	C/C	C/C	C/C	C/C
935877	A	G	ANN=G|intergenic_region|MODIFIER|SGE1-ARR1|YPR198W-YPR199C|intergenic_region|YPR198W-YPR199C|||||||||	A/A	A/A	A/A	A/A	A/A	A/A	A/A	A/A	A/A	A/A	A/A	A/A	A/A	A/A	A/A	A/A	A/A	A/A	A/A	A/A	A/A	A/A	A/A	G/G	G/G	G/G	A/A	A/A	A/A	A/A	A/A	A/A	A/A	A/A	A/A	G/G	A/A	A/A	A/A	A/A	A/A	A/A	A/A	A/A	A/A	A/A
935884	C	T	ANN=T|intergenic_region|MODIFIER|SGE1-ARR1|YPR198W-YPR199C|intergenic_region|YPR198W-YPR199C|||||||||	C/C	C/C	C/C	C/C	C/C	C/C	C/C	C/C	C/C	C/C	C/C	C/C	C/C	C/C	C/C	C/C	C/C	C/C	C/C	C/C	C/C	C/C	C/C	C/C	C/C	C/C	C/C	C/C	C/C	C/C	C/C	C/C	C/C	C/C	C/C	C/C	C/C	C/C	C/C	C/C	C/C	C/C	C/C	C/C	C/C	C/C
935886	T	A	ANN=A|intergenic_region|MODIFIER|SGE1-ARR1|YPR198W-YPR199C|intergenic_region|YPR198W-YPR199C|||||||||	T/T	T/T	T/T	T/T	T/T	T/T	T/T	T/T	T/T	T/T	T/T	T/T	A/A	T/A	T/T	T/A	T/T	T/T	T/T	T/T	T/T	T/T	A/A	T/T	T/T	T/T	T/T	T/T	T/T	T/T	T/T	T/T	T/T	T/T	T/T	T/T	T/T	T/T	T/T	T/T	T/T	T/T	T/T	T/T	T/T	N/N
935906	T	C	ANN=C|intergenic_region|MODIFIER|SGE1-ARR1|YPR198W-YPR199C|intergenic_region|YPR198W-YPR199C|||||||||	T/T	T/T	T/T	T/T	T/T	T/T	T/T	C/C	T/T	T/T	T/T	T/T	T/T	T/T	T/T	T/T	T/T	T/T	T/T	C/C	T/T	T/T	T/T	T/T	T/T	T/T	T/T	T/T	T/T	T/T	T/T	T/T	T/T	T/T	T/T	T/T	T/T	T/T	T/T	C/C	T/T	T/T	T/T	T/T	T/T	T/T
935929	T	C	ANN=C|intergenic_region|MODIFIER|SGE1-ARR1|YPR198W-YPR199C|intergenic_region|YPR198W-YPR199C|||||||||	T/T	T/T	T/T	T/T	T/T	T/T	T/T	T/T	T/T	T/T	T/T	T/T	T/T	T/T	T/T	T/T	T/T	T/T	T/T	T/T	T/T	T/T	T/T	C/C	C/C	C/C	T/T	T/T	T/T	T/T	T/T	T/T	T/T	T/T	T/T	C/C	T/T	T/T	T/T	T/T	T/T	T/T	T/T	T/T	T/T	T/T
935931	G	A,T	ANN=A|intergenic_region|MODIFIER|SGE1-ARR1|YPR198W-YPR199C|intergenic_region|YPR198W-YPR199C|||||||||,T|intergenic_region|MODIFIER|SGE1-ARR1|YPR198W-YPR199C|intergenic_region|YPR198W-YPR199C|||||||||	G/G	G/G	T/T	T/T	T/T	T/T	G/G	G/G	T/T	G/G	T/T	G/G	G/G	G/G	G/G	G/G	T/T	T/T	T/T	G/G	T/T	T/T	G/G	G/G	G/G	G/G	G/G	G/G	G/G	T/T	T/T	G/G	G/G	G/T	T/T	G/G	G/G	G/G	T/T	G/G	T/T	T/T	T/T	G/G	G/G	G/G
935976	A	G	ANN=G|intergenic_region|MODIFIER|SGE1-ARR1|YPR198W-YPR199C|intergenic_region|YPR198W-YPR199C|||||||||	A/A	A/A	A/A	A/A	A/A	A/A	A/A	A/A	A/A	A/A	A/A	A/A	A/A	A/A	A/A	A/A	A/A	A/A	A/A	A/A	A/A	A/A	A/A	G/G	G/G	G/G	A/A	A/A	A/A	A/A	A/A	A/A	A/A	A/A	A/A	G/G	A/A	A/A	A/A	A/A	A/A	A/A	A/A	A/A	A/A	A/A
936020	A	C	ANN=C|intergenic_region|MODIFIER|SGE1-ARR1|YPR198W-YPR199C|intergenic_region|YPR198W-YPR199C|||||||||	A/A	A/A	A/A	A/A	A/A	A/A	A/A	A/A	A/A	A/A	A/A	A/A	A/A	A/A	A/A	A/A	A/A	A/A	A/A	A/A	A/A	A/A	A/A	C/C	C/C	C/C	A/A	A/A	A/A	A/A	A/A	A/A	A/A	A/A	A/A	C/C	A/A	A/A	A/A	A/A	A/A	A/A	A/A	A/A	A/A	A/A
936045	G	T	ANN=T|intergenic_region|MODIFIER|SGE1-ARR1|YPR198W-YPR199C|intergenic_region|YPR198W-YPR199C|||||||||	G/G	G/G	G/G	G/G	G/G	G/G	G/G	G/G	G/G	G/G	G/G	G/G	G/G	G/G	G/G	G/G	G/G	G/G	G/G	G/G	G/G	G/G	G/G	G/G	G/G	G/G	T/T	G/G	G/G	G/G	G/G	G/G	G/G	G/G	G/G	G/G	G/G	G/G	G/G	G/G	G/G	G/G	G/G	G/G	G/G	G/G
936046	C	T	ANN=T|intergenic_region|MODIFIER|SGE1-ARR1|YPR198W-YPR199C|intergenic_region|YPR198W-YPR199C|||||||||	C/C	C/C	C/C	C/C	C/C	C/C	C/C	C/C	C/C	C/C	C/C	C/C	C/C	C/C	C/C	C/C	C/C	C/C	C/C	C/C	C/C	C/C	C/C	T/T	T/T	T/T	C/C	C/C	C/C	C/C	C/C	C/C	C/C	C/C	C/C	T/T	C/C	C/C	C/C	C/C	C/C	C/C	C/C	C/C	C/C	C/C
936050	T	C	ANN=C|intergenic_region|MODIFIER|SGE1-ARR1|YPR198W-YPR199C|intergenic_region|YPR198W-YPR199C|||||||||	T/T	T/T	T/T	T/T	T/T	T/T	T/T	T/T	T/T	T/T	T/T	T/T	T/T	T/T	T/T	T/T	T/T	T/T	T/T	T/T	T/T	T/T	T/T	C/C	C/C	C/C	T/T	T/T	T/T	T/T	T/T	T/T	T/T	T/T	T/T	C/C	T/T	T/T	T/T	T/T	T/T	T/T	T/T	T/T	T/T	T/T
936081	C	T	ANN=T|intergenic_region|MODIFIER|SGE1-ARR1|YPR198W-YPR199C|intergenic_region|YPR198W-YPR199C|||||||||	C/C	T/T	C/C	C/C	C/C	C/C	C/C	C/C	C/C	T/T	C/C	C/C	T/T	T/T	T/T	T/T	C/C	C/C	C/C	C/C	C/C	C/C	T/T	C/C	C/C	C/C	C/C	T/T	C/C	C/C	C/C	T/T	C/T	C/T	C/C	C/C	T/T	C/C	C/C	C/C	C/C	C/C	C/C	T/T	T/T	C/C
936084	A	G	ANN=G|intergenic_region|MODIFIER|SGE1-ARR1|YPR198W-YPR199C|intergenic_region|YPR198W-YPR199C|||||||||	A/A	A/A	A/A	A/A	A/A	A/A	A/A	A/A	A/A	A/A	A/A	A/A	A/A	A/G	G/G	A/G	A/A	A/A	A/A	A/A	A/A	A/A	A/A	A/A	A/A	A/A	A/A	A/A	A/A	A/A	A/A	A/A	A/A	A/A	A/A	A/A	A/A	A/A	A/A	A/A	A/A	A/A	A/A	A/A	A/A	A/A
936101	C	T	ANN=T|intergenic_region|MODIFIER|SGE1-ARR1|YPR198W-YPR199C|intergenic_region|YPR198W-YPR199C|||||||||	C/C	C/C	C/C	C/C	C/C	C/C	C/C	T/T	C/C	C/C	C/C	C/C	C/C	C/C	C/C	C/C	C/C	C/C	C/C	T/T	C/C	C/C	C/C	C/C	C/C	C/C	C/C	C/C	C/C	C/C	C/C	C/C	C/C	C/C	C/C	C/C	C/C	C/C	C/C	T/T	C/C	C/C	C/C	C/C	C/C	C/C
936111	T	C	ANN=C|intergenic_region|MODIFIER|SGE1-ARR1|YPR198W-YPR199C|intergenic_region|YPR198W-YPR199C|||||||||	T/T	T/T	T/T	T/T	T/T	T/T	T/T	T/T	T/T	T/T	T/T	T/T	T/T	T/T	T/T	T/T	T/T	T/T	T/T	T/T	T/T	T/T	T/T	T/T	T/T	T/T	T/T	T/T	T/T	T/T	T/T	T/T	T/T	T/T	T/T	T/T	T/T	T/T	T/T	T/T	T/T	T/T	T/T	T/T	T/T	T/T
936117	T	C	ANN=C|intergenic_region|MODIFIER|SGE1-ARR1|YPR198W-YPR199C|intergenic_region|YPR198W-YPR199C|||||||||	T/T	T/T	T/T	T/T	T/T	T/T	T/T	T/T	T/T	T/T	T/T	T/T	T/T	T/T	T/T	T/T	T/T	T/T	T/T	T/T	T/T	T/T	T/T	C/C	C/C	C/C	T/T	T/T	T/T	T/T	T/T	T/T	T/T	T/T	T/T	C/C	T/T	T/T	T/T	T/T	T/T	T/T	T/T	T/T	T/T	T/T
936148	T	C	ANN=C|intergenic_region|MODIFIER|SGE1-ARR1|YPR198W-YPR199C|intergenic_region|YPR198W-YPR199C|||||||||	T/T	T/T	T/T	T/T	T/T	T/T	T/T	T/T	T/T	T/T	T/T	T/T	T/T	T/T	T/T	T/T	T/T	T/T	T/T	T/T	T/T	T/T	T/T	T/T	T/T	T/T	T/T	T/T	T/T	T/T	T/T	T/T	T/T	T/T	T/T	T/T	T/T	T/T	T/T	T/T	T/T	T/T	T/T	T/T	T/T	T/T
936157	T	C	ANN=C|intergenic_region|MODIFIER|SGE1-ARR1|YPR198W-YPR199C|intergenic_region|YPR198W-YPR199C|||||||||	T/T	T/T	T/T	T/T	T/T	T/T	T/T	T/T	T/T	T/T	T/T	C/C	T/T	T/T	T/T	T/T	T/T	T/T	T/T	T/T	T/T	T/T	T/T	T/T	T/T	T/T	T/T	T/T	T/T	T/T	T/T	T/T	T/T	T/T	T/T	T/T	T/T	C/C	T/T	T/T	T/T	T/T	T/T	T/T	T/T	T/T
936169	A	G	ANN=G|intergenic_region|MODIFIER|SGE1-ARR1|YPR198W-YPR199C|intergenic_region|YPR198W-YPR199C|||||||||	A/A	A/A	A/A	A/A	A/A	A/A	A/A	A/A	A/A	A/A	A/A	A/A	A/A	A/A	A/A	A/A	A/A	A/A	A/A	A/A	A/A	A/A	A/A	G/G	G/G	G/G	A/A	A/A	A/A	A/A	A/A	A/A	A/A	A/A	A/A	G/G	A/A	A/A	A/A	A/A	A/A	A/A	A/A	A/A	A/A	A/A
936185	C	T	ANN=T|intergenic_region|MODIFIER|SGE1-ARR1|YPR198W-YPR199C|intergenic_region|YPR198W-YPR199C|||||||||	C/C	C/C	C/C	C/C	C/C	C/C	C/C	C/C	C/C	C/C	C/C	C/C	C/C	C/C	C/C	C/C	C/C	C/C	C/C	C/C	C/C	C/C	C/C	C/C	C/C	C/C	T/T	C/C	C/C	C/C	C/C	C/C	C/C	C/C	C/C	C/C	C/C	C/C	C/C	C/C	C/C	C/C	C/C	C/C	C/C	C/C
936193	G	A	ANN=A|intergenic_region|MODIFIER|SGE1-ARR1|YPR198W-YPR199C|intergenic_region|YPR198W-YPR199C|||||||||	G/G	G/G	G/G	G/G	G/G	G/G	G/G	A/A	G/G	G/G	G/G	G/G	G/G	G/G	G/G	G/G	G/G	G/G	G/G	G/G	G/G	G/G	G/G	G/G	G/G	G/G	G/G	G/G	G/G	G/G	G/G	G/G	G/G	G/G	G/G	G/G	G/G	G/G	G/G	G/G	G/G	G/G	G/G	G/G	G/G	G/G
936216	T	C	ANN=C|intergenic_region|MODIFIER|SGE1-ARR1|YPR198W-YPR199C|intergenic_region|YPR198W-YPR199C|||||||||	T/T	T/T	T/T	T/T	T/T	T/T	T/T	T/T	T/T	T/T	T/T	T/T	T/T	T/T	T/T	T/T	T/T	T/T	T/T	T/T	T/T	T/T	T/T	C/C	C/C	C/C	T/T	T/T	T/T	T/T	T/T	T/T	T/T	T/T	T/T	T/T	T/T	T/T	T/T	T/T	T/T	T/T	T/T	T/T	T/T	T/T
936217	G	A	ANN=A|intergenic_region|MODIFIER|SGE1-ARR1|YPR198W-YPR199C|intergenic_region|YPR198W-YPR199C|||||||||	G/G	G/G	G/G	G/G	G/G	G/G	A/A	G/G	G/G	G/G	G/G	G/G	G/G	G/G	G/G	G/G	G/G	G/G	G/G	G/G	G/G	G/G	G/G	G/G	G/G	G/G	G/G	G/G	G/G	G/G	G/G	G/G	G/G	G/G	G/G	G/G	G/G	G/G	G/G	G/G	G/G	G/G	G/G	G/G	G/G	G/G
936221	T	C	ANN=C|intergenic_region|MODIFIER|SGE1-ARR1|YPR198W-YPR199C|intergenic_region|YPR198W-YPR199C|||||||||	T/T	T/T	T/T	T/T	T/T	T/T	T/T	T/T	T/T	T/T	T/T	T/T	T/T	T/T	T/T	T/T	T/T	T/T	T/T	T/T	T/T	T/T	T/T	C/C	C/C	C/C	T/T	T/T	T/T	T/T	T/T	T/T	T/T	T/T	T/T	C/C	T/T	T/T	T/T	T/T	T/T	T/T	T/T	T/T	T/T	T/T
936241	T	C	ANN=C|intergenic_region|MODIFIER|SGE1-ARR1|YPR198W-YPR199C|intergenic_region|YPR198W-YPR199C|||||||||	T/T	T/T	T/T	T/T	T/T	T/T	T/T	T/T	T/T	T/T	T/T	T/T	T/T	T/T	T/T	T/T	T/T	T/T	T/T	T/T	T/T	T/T	T/T	T/T	T/T	T/T	T/T	T/T	T/T	T/T	T/T	T/T	T/T	T/T	T/T	T/T	T/T	T/T	T/T	T/T	T/T	T/T	T/T	T/T	T/T	T/T
936251	T	G	ANN=G|intergenic_region|MODIFIER|SGE1-ARR1|YPR198W-YPR199C|intergenic_region|YPR198W-YPR199C|||||||||	T/T	T/T	T/T	T/T	T/T	T/T	T/T	T/T	T/T	T/T	G/G	T/T	T/T	T/T	T/T	T/T	T/T	T/T	T/T	T/T	T/T	T/T	T/T	T/T	T/T	T/T	T/T	T/T	T/T	T/T	T/T	T/T	T/T	T/T	T/T	T/T	T/T	T/T	T/T	T/T	G/G	T/T	T/T	T/T	T/T	T/T
936295	T	C	ANN=C|intergenic_region|MODIFIER|SGE1-ARR1|YPR198W-YPR199C|intergenic_region|YPR198W-YPR199C|||||||||	T/T	T/T	T/T	T/T	T/T	T/T	T/T	T/T	T/T	T/T	T/T	T/T	T/T	T/T	T/T	T/T	T/T	T/T	T/T	T/T	T/T	T/T	T/T	T/C	C/C	C/C	T/T	T/T	T/T	T/T	T/T	T/T	T/T	T/T	T/T	C/C	T/T	T/T	T/T	T/T	T/T	T/T	T/T	T/T	T/T	T/T
936303	C	T	ANN=T|intergenic_region|MODIFIER|SGE1-ARR1|YPR198W-YPR199C|intergenic_region|YPR198W-YPR199C|||||||||	C/C	T/T	C/C	C/C	C/C	C/C	C/C	C/C	C/C	T/T	C/C	C/C	T/T	T/T	T/T	T/T	C/C	C/C	C/C	C/C	C/C	C/C	T/T	C/C	C/C	C/C	C/C	T/T	C/C	C/C	C/C	T/T	C/T	C/T	C/C	C/C	T/T	C/C	C/C	C/C	C/C	C/C	C/C	T/T	T/T	C/C
936324	A	G	ANN=G|intergenic_region|MODIFIER|SGE1-ARR1|YPR198W-YPR199C|intergenic_region|YPR198W-YPR199C|||||||||	A/A	A/A	A/A	A/A	A/A	A/A	A/A	A/A	A/A	A/A	A/A	A/A	A/A	A/A	A/A	A/A	A/A	A/A	A/A	A/A	A/A	A/A	A/A	A/G	G/G	G/G	A/A	A/A	A/A	A/A	A/A	A/A	A/A	A/A	A/A	G/G	A/A	A/A	A/A	A/A	A/A	A/A	A/A	A/A	A/A	A/A
936327	A	G	ANN=G|intergenic_region|MODIFIER|SGE1-ARR1|YPR198W-YPR199C|intergenic_region|YPR198W-YPR199C|||||||||	A/A	A/A	A/A	A/A	A/A	A/A	A/A	G/G	A/A	A/A	A/A	A/A	A/A	A/A	A/A	A/A	A/A	A/A	A/A	G/G	A/A	A/A	A/A	A/A	A/A	A/A	A/A	A/A	A/A	A/A	A/A	A/A	A/A	A/A	A/A	A/A	A/A	A/A	A/A	G/G	A/A	A/A	A/A	A/A	A/A	A/A
936338	G	C	ANN=C|intergenic_region|MODIFIER|SGE1-ARR1|YPR198W-YPR199C|intergenic_region|YPR198W-YPR199C|||||||||	G/G	G/G	G/G	G/G	G/G	G/G	G/G	G/G	G/G	G/G	G/G	G/G	G/G	G/G	G/G	G/G	G/G	G/G	G/G	G/G	G/G	G/G	G/G	G/G	G/G	G/G	G/G	G/G	G/G	G/G	G/G	G/G	G/G	G/G	G/G	G/G	G/G	G/G	G/G	G/G	G/G	G/G	G/G	G/G	G/G	G/G
936339	A	G	ANN=G|intergenic_region|MODIFIER|SGE1-ARR1|YPR198W-YPR199C|intergenic_region|YPR198W-YPR199C|||||||||	A/A	A/A	A/A	A/A	A/A	A/A	A/A	A/A	A/A	A/A	A/A	A/A	A/A	A/A	A/A	A/A	A/A	A/A	A/A	A/A	A/A	A/A	A/A	A/A	A/A	A/A	G/G	A/A	A/A	A/A	A/A	A/A	A/A	A/A	A/A	A/A	A/A	A/A	A/A	A/A	A/A	A/A	A/A	A/A	A/A	A/A
936363	C	T	ANN=T|intergenic_region|MODIFIER|SGE1-ARR1|YPR198W-YPR199C|intergenic_region|YPR198W-YPR199C|||||||||	C/C	C/C	C/C	C/C	C/C	C/C	C/C	T/T	C/C	C/C	C/C	C/C	C/C	C/C	C/C	C/C	C/C	C/C	C/C	T/T	C/C	C/C	C/C	C/C	C/C	C/C	C/C	C/C	C/C	C/C	C/C	C/C	C/C	C/C	C/C	C/C	C/C	C/C	C/C	T/T	C/C	C/C	C/C	C/C	C/C	C/C
936381	A	G	ANN=G|intergenic_region|MODIFIER|SGE1-ARR1|YPR198W-YPR199C|intergenic_region|YPR198W-YPR199C|||||||||	A/A	A/A	A/A	A/A	A/A	A/A	A/A	A/A	A/A	A/A	A/A	A/A	A/A	A/A	A/A	A/A	A/A	A/A	A/A	A/A	A/A	A/A	A/A	A/A	A/A	A/A	G/G	A/A	A/A	A/A	A/A	A/A	A/A	A/A	A/A	A/A	A/A	A/A	A/A	A/A	A/A	A/A	A/A	A/A	A/A	A/A
936385	G	A	ANN=A|intergenic_region|MODIFIER|SGE1-ARR1|YPR198W-YPR199C|intergenic_region|YPR198W-YPR199C|||||||||	G/G	G/G	G/G	G/G	G/G	G/G	G/G	G/G	G/G	G/G	G/G	G/G	G/G	G/G	G/G	G/G	G/G	G/G	G/G	G/G	G/G	G/G	G/G	G/G	G/G	G/G	G/G	G/G	G/G	G/G	G/G	G/G	G/G	G/G	G/G	G/G	G/G	G/G	G/G	G/G	G/G	G/G	G/G	G/G	G/G	G/G
936387	G	T	ANN=T|intergenic_region|MODIFIER|SGE1-ARR1|YPR198W-YPR199C|intergenic_region|YPR198W-YPR199C|||||||||	G/G	G/G	G/G	G/G	G/G	G/G	G/G	G/G	G/G	G/G	G/G	G/G	G/G	G/G	G/G	G/G	G/G	G/G	G/G	G/G	G/G	G/G	G/G	G/G	G/G	G/G	G/G	G/G	G/G	G/G	G/G	G/G	G/G	G/G	G/G	G/G	G/G	G/G	G/G	G/G	G/G	G/G	G/G	G/G	G/G	G/G
936393	G	C	ANN=C|intergenic_region|MODIFIER|SGE1-ARR1|YPR198W-YPR199C|intergenic_region|YPR198W-YPR199C|||||||||	G/G	C/C	G/G	G/G	G/G	G/G	G/G	C/C	G/G	C/C	G/G	G/G	C/C	C/C	C/C	C/C	G/G	G/G	G/G	C/C	G/G	G/G	C/C	G/G	G/G	G/G	G/G	C/C	G/G	G/G	G/G	C/C	G/C	G/C	G/G	G/G	C/C	G/G	G/G	C/C	G/G	G/G	G/G	C/C	C/C	G/G
936415	A	C	ANN=C|intergenic_region|MODIFIER|SGE1-ARR1|YPR198W-YPR199C|intergenic_region|YPR198W-YPR199C|||||||||	A/A	A/A	A/A	A/A	A/A	A/A	A/A	A/A	A/A	A/A	A/A	A/A	A/A	A/A	A/A	A/A	A/A	A/A	A/A	A/A	A/A	A/A	A/A	C/C	C/C	C/C	A/A	A/A	A/A	A/A	A/A	A/A	A/A	A/A	A/A	C/C	A/A	A/A	A/A	A/A	A/A	A/A	A/A	A/A	A/A	A/A
936424	T	C	ANN=C|intergenic_region|MODIFIER|SGE1-ARR1|YPR198W-YPR199C|intergenic_region|YPR198W-YPR199C|||||||||	T/T	T/T	T/T	T/T	T/T	T/T	T/T	T/T	T/T	T/T	T/T	T/T	T/T	T/T	T/T	T/T	T/T	T/T	T/T	T/T	T/T	T/T	T/T	T/T	T/T	T/T	T/T	T/T	T/T	T/T	T/T	T/T	T/T	T/T	T/T	T/T	T/T	T/T	T/T	T/T	T/T	T/T	T/T	T/T	T/T	T/T
936431	G	A	ANN=A|intergenic_region|MODIFIER|SGE1-ARR1|YPR198W-YPR199C|intergenic_region|YPR198W-YPR199C|||||||||	G/G	A/A	G/G	G/G	G/G	G/G	G/G	A/A	G/G	A/A	G/G	A/A	A/A	A/A	A/A	A/A	G/G	G/G	G/G	A/A	G/G	G/G	A/A	A/A	A/A	A/A	A/A	A/A	G/G	G/G	G/G	A/A	G/A	G/A	G/G	A/A	A/A	A/A	G/G	A/A	G/G	G/G	G/G	A/A	A/A	G/G
936433	C	T	ANN=T|intergenic_region|MODIFIER|SGE1-ARR1|YPR198W-YPR199C|intergenic_region|YPR198W-YPR199C|||||||||	C/C	C/C	C/C	C/C	C/C	C/C	C/C	C/C	C/C	C/C	C/C	C/C	C/C	C/C	C/C	C/C	C/C	C/C	C/C	C/C	C/C	C/C	C/C	C/C	C/C	C/C	T/T	C/C	C/C	C/C	C/C	C/C	C/C	C/C	C/C	C/C	C/C	C/C	C/C	C/C	C/C	C/C	C/C	C/C	C/C	C/C
936479	C	A,G	ANN=A|intergenic_region|MODIFIER|SGE1-ARR1|YPR198W-YPR199C|intergenic_region|YPR198W-YPR199C|||||||||,G|intergenic_region|MODIFIER|SGE1-ARR1|YPR198W-YPR199C|intergenic_region|YPR198W-YPR199C|||||||||	C/C	C/G	C/C	C/C	C/C	C/C	C/C	C/C	C/C	C/C	C/C	C/C	C/C	C/C	C/C	C/C	C/C	C/C	C/C	C/C	C/C	C/C	C/C	C/C	C/C	C/C	C/C	C/C	C/C	C/C	C/C	C/C	C/C	C/C	C/C	C/C	C/C	C/C	C/C	C/C	C/C	C/C	C/C	C/C	C/C	C/C
936480	G	A	ANN=A|intergenic_region|MODIFIER|SGE1-ARR1|YPR198W-YPR199C|intergenic_region|YPR198W-YPR199C|||||||||	G/G	G/G	G/G	G/G	G/G	G/G	G/G	G/G	G/G	G/G	G/G	G/G	G/G	G/G	G/G	G/G	G/G	G/G	G/G	G/G	G/G	G/G	G/G	G/A	A/A	A/A	G/G	G/G	G/G	G/G	G/G	G/G	G/G	G/G	G/G	A/A	G/G	G/G	G/G	G/G	G/G	G/G	G/G	G/G	G/G	G/G
936481	G	A	ANN=A|intergenic_region|MODIFIER|SGE1-ARR1|YPR198W-YPR199C|intergenic_region|YPR198W-YPR199C|||||||||	G/G	G/G	G/G	G/G	G/G	G/G	G/G	G/G	G/G	G/G	G/G	G/G	G/G	G/G	G/G	G/G	G/G	G/G	G/G	G/G	G/G	G/G	G/G	G/A	A/A	A/A	G/G	G/G	G/G	G/G	G/G	G/G	G/G	G/G	G/G	A/A	G/G	G/G	G/G	G/G	G/G	G/G	G/G	G/G	G/G	G/G
936484	T	C	ANN=C|intergenic_region|MODIFIER|SGE1-ARR1|YPR198W-YPR199C|intergenic_region|YPR198W-YPR199C|||||||||	T/T	T/T	T/T	T/T	T/T	T/T	T/T	T/T	T/T	T/T	T/T	T/T	T/T	T/T	T/T	T/T	T/T	T/T	T/T	T/T	T/T	T/T	T/T	T/C	C/C	C/C	T/T	T/T	T/T	T/T	T/T	T/T	T/T	T/T	T/T	C/C	T/T	T/T	T/T	T/T	T/T	T/T	T/T	T/T	T/T	T/T
936487	C	A	ANN=A|intergenic_region|MODIFIER|SGE1-ARR1|YPR198W-YPR199C|intergenic_region|YPR198W-YPR199C|||||||||	C/C	C/C	C/C	C/C	C/C	C/C	C/C	C/C	C/C	C/C	C/C	C/C	C/C	C/C	C/C	C/C	C/C	C/C	C/C	C/C	C/C	C/C	C/C	C/C	C/C	C/C	A/A	C/C	C/C	C/C	C/C	C/C	C/C	C/C	C/C	C/C	C/C	C/C	C/C	C/C	C/C	C/C	C/C	C/C	C/C	C/C
936499	G	T	ANN=T|intergenic_region|MODIFIER|SGE1-ARR1|YPR198W-YPR199C|intergenic_region|YPR198W-YPR199C|||||||||	G/G	G/G	G/G	G/G	G/G	G/G	G/G	G/G	G/G	G/G	G/G	G/G	G/G	G/G	G/G	G/G	G/G	G/G	G/G	G/G	G/G	G/G	G/G	G/T	T/T	T/T	G/G	G/G	G/G	G/G	G/G	G/G	G/G	G/G	G/G	T/T	G/G	G/G	G/G	G/G	G/G	G/G	G/G	G/G	G/G	G/G
936528	A	C	ANN=C|intergenic_region|MODIFIER|SGE1-ARR1|YPR198W-YPR199C|intergenic_region|YPR198W-YPR199C|||||||||	A/A	A/A	A/A	A/A	A/A	A/A	A/A	A/A	A/A	A/A	A/A	A/A	A/A	A/A	A/A	A/A	A/A	A/A	A/A	A/A	A/A	A/A	A/A	A/A	A/A	A/A	A/A	A/A	A/A	A/A	A/A	A/A	A/A	A/A	A/A	A/A	A/A	A/A	A/A	A/A	A/A	A/A	A/A	A/A	A/A	A/A
936529	G	A	ANN=A|intergenic_region|MODIFIER|SGE1-ARR1|YPR198W-YPR199C|intergenic_region|YPR198W-YPR199C|||||||||	G/G	G/G	G/G	G/G	G/G	G/G	G/G	G/G	G/G	G/G	G/G	G/G	G/G	G/G	G/G	G/G	G/G	G/G	G/G	G/G	G/G	G/G	G/G	G/G	G/G	G/G	G/G	G/G	G/G	G/G	G/G	G/G	G/G	G/G	G/G	G/G	G/G	G/G	G/G	G/G	G/G	G/G	G/G	G/G	G/G	G/G
936531	A	C	ANN=C|intergenic_region|MODIFIER|SGE1-ARR1|YPR198W-YPR199C|intergenic_region|YPR198W-YPR199C|||||||||	A/A	A/A	A/A	A/A	A/A	A/A	A/A	A/A	A/A	A/A	A/A	A/A	A/A	A/A	A/A	A/A	A/A	A/A	A/A	A/A	A/A	A/A	A/A	C/C	C/C	C/C	A/A	A/A	A/A	A/A	A/A	A/A	A/A	A/A	A/A	C/C	A/A	A/A	A/A	A/A	A/A	A/A	A/A	A/A	A/A	A/A
936538	G	A	ANN=A|intergenic_region|MODIFIER|SGE1-ARR1|YPR198W-YPR199C|intergenic_region|YPR198W-YPR199C|||||||||	G/G	G/G	G/G	G/G	G/G	G/G	G/G	G/G	G/G	G/G	G/G	G/G	G/G	G/G	G/G	G/G	G/G	G/G	G/G	G/G	G/G	G/G	G/G	G/G	G/G	G/G	A/A	G/G	G/G	G/G	G/G	G/G	G/G	G/G	G/G	G/G	G/G	G/G	G/G	G/G	G/G	G/G	G/G	G/G	G/G	G/G
936544	G	A	ANN=A|intergenic_region|MODIFIER|SGE1-ARR1|YPR198W-YPR199C|intergenic_region|YPR198W-YPR199C|||||||||	G/G	G/G	G/G	G/G	G/G	G/G	G/G	G/G	G/G	G/G	G/G	G/G	G/G	G/G	G/G	G/G	G/G	G/G	G/G	G/G	G/G	G/G	G/G	G/G	G/G	G/G	A/A	G/G	G/G	G/G	G/G	G/G	G/G	G/G	G/G	G/G	G/G	G/G	G/G	G/G	G/G	G/G	G/G	G/G	G/G	G/G
936550	T	A	ANN=A|intergenic_region|MODIFIER|SGE1-ARR1|YPR198W-YPR199C|intergenic_region|YPR198W-YPR199C|||||||||	T/T	T/T	T/T	T/T	T/T	T/T	T/T	T/T	T/T	T/T	T/T	T/T	T/T	T/T	T/T	T/T	T/T	T/T	T/T	T/T	T/T	T/T	T/T	T/T	T/T	T/T	T/T	T/T	T/T	T/T	A/A	T/T	T/T	T/A	A/A	T/T	T/T	T/T	T/T	T/T	T/T	T/T	T/T	T/T	T/T	T/T
936594	A	G	ANN=G|intergenic_region|MODIFIER|SGE1-ARR1|YPR198W-YPR199C|intergenic_region|YPR198W-YPR199C|||||||||	A/A	A/A	A/A	A/A	A/A	A/A	G/G	A/A	A/A	A/A	A/A	A/A	A/A	A/A	A/A	A/A	A/A	A/A	A/A	A/A	A/A	A/A	A/A	A/A	A/A	A/A	A/A	A/A	A/A	A/A	A/A	A/A	A/A	A/A	A/A	A/A	A/A	A/A	A/A	A/A	A/A	A/A	A/A	A/A	A/A	A/A
936603	G	A	ANN=A|intergenic_region|MODIFIER|SGE1-ARR1|YPR198W-YPR199C|intergenic_region|YPR198W-YPR199C|||||||||	G/G	G/G	G/G	G/G	G/G	G/G	G/G	G/G	G/G	G/G	G/G	G/G	G/G	G/G	G/G	G/G	G/G	G/G	G/G	G/G	G/G	G/G	G/G	G/G	G/G	G/G	G/G	G/G	G/G	G/G	G/G	G/G	G/G	G/G	G/G	G/G	G/G	G/G	G/G	G/G	G/G	G/G	G/G	G/G	G/G	G/G
936612	T	A	ANN=A|intergenic_region|MODIFIER|SGE1-ARR1|YPR198W-YPR199C|intergenic_region|YPR198W-YPR199C|||||||||	T/T	T/T	T/T	T/T	T/T	T/T	T/T	T/T	T/T	T/T	T/T	T/T	T/T	T/T	T/T	T/T	T/T	T/T	T/T	T/T	T/T	T/T	T/T	T/T	T/T	T/T	T/T	T/T	T/T	T/T	T/T	T/T	T/T	T/T	T/T	T/T	T/T	T/T	T/T	T/T	T/T	T/T	T/T	T/T	T/T	T/T
936637	A	T	ANN=T|intergenic_region|MODIFIER|SGE1-ARR1|YPR198W-YPR199C|intergenic_region|YPR198W-YPR199C|||||||||	A/A	A/A	A/A	A/A	T/T	A/A	A/A	A/A	A/A	A/A	A/A	A/A	A/A	A/A	A/A	A/A	T/T	A/A	T/T	A/A	T/T	A/A	A/A	A/A	A/A	A/A	A/A	A/A	A/A	T/T	A/A	A/A	A/A	A/T	A/A	A/A	A/A	A/A	A/A	A/A	A/A	A/A	A/A	A/A	A/A	A/A
936638	G	C	ANN=C|intergenic_region|MODIFIER|SGE1-ARR1|YPR198W-YPR199C|intergenic_region|YPR198W-YPR199C|||||||||	G/G	C/C	G/G	G/G	G/G	G/G	G/G	C/C	G/G	C/C	G/G	G/G	C/C	C/C	C/C	C/C	G/G	G/G	G/G	C/C	G/G	G/G	C/C	C/C	C/C	C/C	C/C	C/C	G/G	G/G	G/G	C/C	G/C	G/C	G/G	C/C	C/C	G/G	G/G	C/C	G/G	G/G	G/G	C/C	C/C	G/G
936644	A	G	ANN=G|intergenic_region|MODIFIER|SGE1-ARR1|YPR198W-YPR199C|intergenic_region|YPR198W-YPR199C|||||||||	A/A	A/A	A/A	A/A	A/A	A/A	A/A	A/A	A/A	A/A	A/A	A/A	A/A	A/A	A/A	A/A	A/A	A/A	A/A	A/A	A/A	A/A	A/A	A/A	A/A	A/A	A/A	A/A	A/A	A/A	A/A	A/A	A/A	A/A	A/A	A/A	A/A	A/A	A/A	A/A	A/A	A/A	A/A	A/A	A/A	A/A
936651	C	T	ANN=T|intergenic_region|MODIFIER|SGE1-ARR1|YPR198W-YPR199C|intergenic_region|YPR198W-YPR199C|||||||||	C/C	C/C	C/C	C/C	C/C	C/C	C/C	C/C	C/C	C/C	C/C	C/C	C/C	C/C	C/C	C/C	C/C	C/C	C/C	C/C	C/C	C/C	C/C	T/T	T/T	T/T	C/C	C/C	C/C	C/C	C/C	C/C	C/C	C/C	C/C	T/T	C/C	C/C	C/C	C/C	C/C	C/C	C/C	C/C	C/C	C/C
936666	A	G	ANN=G|intergenic_region|MODIFIER|SGE1-ARR1|YPR198W-YPR199C|intergenic_region|YPR198W-YPR199C|||||||||	A/A	A/A	A/A	A/A	A/A	G/G	A/A	A/A	G/G	A/A	A/A	A/A	A/A	A/A	A/A	A/A	A/A	G/G	A/A	A/A	A/A	A/A	A/A	A/A	A/A	A/A	A/A	A/A	A/A	A/A	A/A	A/A	A/A	A/A	A/A	A/A	A/A	A/A	G/G	A/A	A/A	A/A	A/A	A/A	A/A	A/A
936699	G	A	ANN=A|intergenic_region|MODIFIER|SGE1-ARR1|YPR198W-YPR199C|intergenic_region|YPR198W-YPR199C|||||||||	G/G	G/G	G/G	G/G	G/G	G/G	G/G	G/G	G/G	G/G	G/G	A/A	G/G	G/G	G/G	G/G	G/G	G/G	G/G	G/G	G/G	G/G	G/G	G/G	G/G	G/G	G/G	G/G	G/G	G/G	G/G	G/G	G/G	G/G	G/G	G/G	G/G	A/A	G/G	G/G	G/G	G/G	G/G	G/G	G/G	G/G
936706	C	T	ANN=T|intergenic_region|MODIFIER|SGE1-ARR1|YPR198W-YPR199C|intergenic_region|YPR198W-YPR199C|||||||||	C/C	C/C	C/C	C/C	C/C	C/C	C/C	C/C	C/C	C/T	C/C	C/C	C/C	C/T	C/C	C/T	C/C	C/C	C/C	C/C	C/C	C/C	C/C	C/C	C/C	C/C	C/C	C/C	C/C	C/C	C/C	C/C	C/C	C/C	C/C	C/C	C/C	C/C	C/C	C/C	C/C	C/C	C/C	C/C	C/C	C/C
936712	G	A	ANN=A|intergenic_region|MODIFIER|SGE1-ARR1|YPR198W-YPR199C|intergenic_region|YPR198W-YPR199C|||||||||	G/G	G/G	G/G	G/G	G/G	G/G	G/G	G/G	G/G	G/G	G/G	G/G	G/G	G/G	G/G	G/G	G/G	G/G	G/G	G/G	G/G	G/G	G/G	G/A	A/A	A/A	G/G	G/G	G/G	G/G	G/G	G/G	G/G	G/G	G/G	A/A	G/G	G/G	G/G	G/G	G/G	G/G	G/G	G/G	G/G	G/G
936714	T	C	ANN=C|intergenic_region|MODIFIER|SGE1-ARR1|YPR198W-YPR199C|intergenic_region|YPR198W-YPR199C|||||||||	T/T	T/T	T/T	T/T	T/T	T/T	T/T	T/T	T/T	T/T	T/T	T/T	T/T	T/T	T/T	T/T	T/T	T/T	T/T	T/T	T/T	T/T	T/T	T/T	T/T	T/T	T/T	T/T	T/T	T/T	T/T	T/T	T/T	T/T	T/T	T/T	T/T	T/T	T/T	T/T	T/T	T/T	T/T	T/T	T/T	T/T
936758	T	C	ANN=C|intergenic_region|MODIFIER|SGE1-ARR1|YPR198W-YPR199C|intergenic_region|YPR198W-YPR199C|||||||||	T/T	T/C	T/T	T/T	T/T	T/T	T/T	T/T	T/T	C/C	T/T	T/T	C/C	C/C	C/C	C/C	T/T	T/T	T/T	T/T	T/T	T/T	C/C	T/T	N/N	N/N	T/T	C/C	T/T	T/T	T/T	C/C	T/C	T/C	T/T	T/C	C/C	T/T	T/T	T/T	T/T	T/T	T/T	C/C	C/C	T/T
936775	C	T	ANN=T|intergenic_region|MODIFIER|SGE1-ARR1|YPR198W-YPR199C|intergenic_region|YPR198W-YPR199C|||||||||	C/C	C/C	C/C	C/C	C/C	C/T	C/C	C/C	C/C	C/C	C/C	C/C	C/C	C/C	C/C	C/C	C/C	C/C	C/C	C/C	C/C	C/C	C/C	N/N	N/N	N/N	C/C	C/C	C/C	C/C	C/C	C/C	C/C	C/C	C/C	C/C	C/C	C/C	C/C	C/C	C/C	C/C	C/C	C/C	C/C	C/C
936777	C	T	ANN=T|intergenic_region|MODIFIER|SGE1-ARR1|YPR198W-YPR199C|intergenic_region|YPR198W-YPR199C|||||||||	C/C	C/C	C/C	C/C	C/C	C/C	C/C	C/C	C/C	C/C	C/C	C/C	C/C	C/C	C/C	C/C	C/C	C/C	C/C	C/C	C/C	C/C	C/C	N/N	N/N	N/N	T/T	C/C	C/C	C/C	C/C	C/C	C/C	C/C	C/C	C/C	C/C	C/C	C/C	C/C	C/C	C/C	C/C	C/C	C/C	T/T
936797	C	G	ANN=G|intergenic_region|MODIFIER|SGE1-ARR1|YPR198W-YPR199C|intergenic_region|YPR198W-YPR199C|||||||||	C/C	C/G	C/C	C/C	C/C	C/C	C/C	C/C	C/C	G/G	C/C	C/C	G/G	G/G	G/G	G/G	C/C	C/C	C/C	C/C	C/C	C/C	G/G	N/N	N/N	N/N	C/C	G/G	C/C	C/C	C/C	G/G	C/G	C/G	C/C	C/G	G/G	C/C	C/C	C/C	C/C	C/C	C/C	G/G	G/G	C/C
936807	T	C	ANN=C|intergenic_region|MODIFIER|SGE1-ARR1|YPR198W-YPR199C|intergenic_region|YPR198W-YPR199C|||||||||	T/T	T/C	C/C	T/T	T/T	T/T	T/T	T/T	T/T	T/T	C/C	T/T	T/T	T/T	T/T	T/T	T/T	T/T	T/T	T/T	T/T	C/C	T/T	N/N	N/N	N/N	T/T	T/T	T/T	T/T	C/C	T/T	T/T	T/C	C/C	C/C	T/T	T/T	T/T	T/T	C/C	C/C	C/C	T/T	T/T	T/T
936815	A	G	ANN=G|intergenic_region|MODIFIER|SGE1-ARR1|YPR198W-YPR199C|intergenic_region|YPR198W-YPR199C|||||||||	A/A	A/A	A/A	A/A	A/A	A/A	G/G	A/A	A/A	A/A	A/A	A/A	A/A	A/A	A/A	A/A	A/A	A/A	A/A	A/A	A/A	A/A	A/A	N/N	N/N	N/N	A/A	A/A	A/A	A/A	A/A	A/A	A/A	A/A	A/A	A/A	A/A	A/A	A/A	A/A	A/A	A/A	A/A	A/A	A/A	A/A
936816	G	A	ANN=A|intergenic_region|MODIFIER|SGE1-ARR1|YPR198W-YPR199C|intergenic_region|YPR198W-YPR199C|||||||||	G/G	G/A	G/G	G/G	G/G	G/G	G/G	G/G	G/G	A/A	G/G	G/G	A/A	A/A	A/A	A/A	G/G	G/G	G/G	G/G	G/G	G/G	A/A	N/N	N/N	N/N	G/G	A/A	G/G	G/G	G/G	A/A	G/A	G/A	G/G	G/G	A/A	G/G	G/G	G/G	G/G	G/G	G/G	A/A	A/A	G/G
936837	A	T	ANN=T|intergenic_region|MODIFIER|SGE1-ARR1|YPR198W-YPR199C|intergenic_region|YPR198W-YPR199C|||||||||	A/A	A/T	T/T	A/A	A/A	A/A	A/A	A/A	A/A	A/A	T/T	A/A	A/A	A/A	A/A	A/A	A/A	A/A	A/A	A/A	A/A	T/T	A/A	A/A	N/N	N/N	A/A	A/A	A/A	A/A	T/T	A/A	A/A	A/T	T/T	N/N	A/A	A/A	A/A	A/A	T/T	T/T	T/T	A/A	A/A	A/A
936866	T	C	ANN=C|intergenic_region|MODIFIER|SGE1-ARR1|YPR198W-YPR199C|intergenic_region|YPR198W-YPR199C|||||||||	T/T	T/T	T/T	T/T	T/T	T/T	T/T	T/T	T/T	T/T	T/T	T/T	T/T	T/T	T/T	T/T	T/T	T/T	T/T	T/T	T/T	T/T	T/T	T/T	N/N	N/N	T/T	C/C	T/T	T/T	T/T	T/T	T/T	T/C	T/T	N/N	T/T	T/T	T/T	T/T	T/T	T/T	T/T	C/C	T/C	T/T
936912	T	G	ANN=G|intergenic_region|MODIFIER|SGE1-ARR1|YPR198W-YPR199C|intergenic_region|YPR198W-YPR199C|||||||||	T/T	T/T	T/T	T/T	T/T	T/T	T/T	G/G	T/T	T/T	T/T	T/T	T/T	T/T	T/T	T/T	T/T	T/T	T/T	G/G	T/T	T/T	T/T	T/T	N/N	N/N	T/T	T/T	T/T	T/T	T/T	T/T	T/T	T/T	T/T	N/N	T/T	T/T	T/T	G/G	T/T	T/T	T/T	T/T	T/T	T/T
936916	A	T	ANN=T|intergenic_region|MODIFIER|SGE1-ARR1|YPR198W-YPR199C|intergenic_region|YPR198W-YPR199C|||||||||	A/A	A/A	A/A	A/A	A/A	A/A	A/A	A/A	A/A	A/A	A/A	A/A	A/A	A/A	A/A	A/A	A/A	A/A	A/A	A/A	A/A	A/A	A/A	A/A	N/N	N/N	A/A	A/A	A/A	A/A	A/A	A/A	A/A	A/A	A/A	N/N	A/A	A/A	A/A	A/A	A/A	A/A	A/A	A/A	A/A	A/A
936922	G	A	ANN=A|intergenic_region|MODIFIER|SGE1-ARR1|YPR198W-YPR199C|intergenic_region|YPR198W-YPR199C|||||||||	G/G	G/A	G/G	G/G	G/G	G/G	G/G	G/G	G/G	A/A	G/G	G/G	A/A	A/A	A/A	A/A	G/G	G/G	G/G	G/G	G/G	G/G	A/A	G/G	N/N	N/N	G/G	A/A	G/G	G/G	G/G	A/A	G/A	G/A	G/G	N/N	A/A	G/G	G/G	G/G	G/G	G/G	G/G	A/A	A/A	G/G
936936	G	A	ANN=A|intergenic_region|MODIFIER|SGE1-ARR1|YPR198W-YPR199C|intergenic_region|YPR198W-YPR199C|||||||||	G/G	G/G	G/G	G/G	G/G	G/G	G/G	G/G	G/G	G/G	G/G	G/G	G/G	G/G	G/G	G/G	G/G	G/G	G/G	G/G	G/G	G/G	G/G	G/G	N/N	N/N	G/G	G/G	G/G	G/G	G/G	G/G	G/G	G/A	G/G	N/N	G/G	G/G	G/G	G/G	G/G	G/G	G/G	G/G	G/G	G/G
936956	T	C	ANN=C|intergenic_region|MODIFIER|SGE1-ARR1|YPR198W-YPR199C|intergenic_region|YPR198W-YPR199C|||||||||	T/T	T/T	T/T	T/T	T/T	T/T	T/T	T/T	T/T	T/T	T/T	T/T	T/T	T/T	T/T	T/T	T/T	T/T	T/T	T/T	T/T	T/T	T/T	N/N	N/N	N/N	T/T	C/C	T/T	T/T	T/T	T/T	T/T	T/C	T/T	N/N	T/T	T/T	T/T	T/T	T/T	T/T	T/T	C/C	T/C	T/T
936989	T	C	ANN=C|intergenic_region|MODIFIER|SGE1-ARR1|YPR198W-YPR199C|intergenic_region|YPR198W-YPR199C|||||||||	T/T	T/T	T/T	T/T	T/T	T/T	T/T	T/T	T/T	T/T	T/T	T/T	T/T	T/T	T/T	T/T	T/T	T/T	T/T	T/T	T/T	T/T	T/T	T/T	N/N	T/T	T/T	T/T	T/T	T/T	T/T	T/T	T/T	T/T	T/T	N/N	T/T	T/T	T/T	T/T	T/T	T/T	T/T	T/T	T/T	T/T
937037	T	C	ANN=C|intergenic_region|MODIFIER|SGE1-ARR1|YPR198W-YPR199C|intergenic_region|YPR198W-YPR199C|||||||||	T/T	T/C	T/T	T/T	T/T	T/T	T/T	T/T	T/T	T/C	T/T	T/T	T/T	T/C	C/C	T/C	T/T	T/T	T/T	T/T	T/T	T/T	T/T	T/T	N/N	N/N	T/T	T/T	T/T	T/T	T/T	T/T	T/C	T/T	T/T	T/T	T/T	T/T	T/T	T/T	T/T	T/T	T/T	T/T	T/C	T/T
937042	C	A,T	ANN=A|intergenic_region|MODIFIER|SGE1-ARR1|YPR198W-YPR199C|intergenic_region|YPR198W-YPR199C|||||||||,T|intergenic_region|MODIFIER|SGE1-ARR1|YPR198W-YPR199C|intergenic_region|YPR198W-YPR199C|||||||||	C/C	C/C	C/C	C/C	C/C	C/C	C/C	C/C	C/C	C/C	C/C	A,T/A,T	C/C	C/C	C/C	C/C	C/C	C/C	C/C	C/C	C/C	C/C	C/C	C/C	N/N	C/C	C/C	C/C	C/C	C/C	C/C	C/C	C/C	C/C	C/C	A,T/A,T	C/C	C/C	C/C	C/C	C/C	C/C	C/C	C/C	C/C	C/C
937050	T	C	ANN=C|intergenic_region|MODIFIER|SGE1-ARR1|YPR198W-YPR199C|intergenic_region|YPR198W-YPR199C|||||||||	T/T	T/T	T/T	T/T	T/T	T/T	C/C	T/T	T/T	T/T	T/T	T/T	T/T	T/T	T/T	T/T	T/T	T/T	T/T	T/T	T/T	T/T	T/T	T/T	N/N	T/T	C/C	T/T	T/T	T/T	T/T	T/T	T/T	T/T	T/T	T/T	T/T	T/T	T/T	T/T	T/T	T/T	T/T	T/T	T/T	T/T
937052	A	G	ANN=G|intergenic_region|MODIFIER|SGE1-ARR1|YPR198W-YPR199C|intergenic_region|YPR198W-YPR199C|||||||||	A/A	A/A	G/G	A/A	A/A	A/A	A/A	A/A	A/A	A/A	G/G	A/A	A/A	A/A	A/A	A/A	A/A	A/A	A/A	A/A	A/A	G/G	A/A	A/A	N/N	A/A	A/A	A/A	A/A	A/A	G/G	A/A	A/A	A/G	G/G	A/A	A/A	A/A	A/A	A/A	G/G	G/G	G/G	A/A	A/A	A/A
937066	C	T	ANN=T|intergenic_region|MODIFIER|SGE1-ARR1|YPR198W-YPR199C|intergenic_region|YPR198W-YPR199C|||||||||	C/C	C/C	C/C	C/C	C/C	C/C	C/C	C/C	C/C	C/C	C/C	C/C	C/C	C/C	C/C	C/C	C/C	C/C	C/C	C/C	C/C	C/C	C/C	C/C	N/N	C/C	T/T	C/C	C/C	C/C	C/C	C/C	C/C	C/C	C/C	C/C	C/C	C/C	C/C	C/C	C/C	C/C	C/C	C/C	C/C	C/C
937087	A	G	ANN=G|intergenic_region|MODIFIER|SGE1-ARR1|YPR198W-YPR199C|intergenic_region|YPR198W-YPR199C|||||||||	A/A	A/G	A/A	A/A	A/A	A/A	A/A	A/A	A/A	G/G	A/A	A/A	G/G	G/G	G/G	G/G	A/A	A/A	A/A	A/A	A/A	A/A	G/G	A/A	N/N	A/A	A/A	G/G	A/A	A/A	A/A	G/G	A/G	A/G	A/A	A/A	G/G	A/A	A/A	A/A	A/A	A/A	A/A	G/G	G/G	A/A
937090	A	G	ANN=G|intergenic_region|MODIFIER|SGE1-ARR1|YPR198W-YPR199C|intergenic_region|YPR198W-YPR199C|||||||||	A/A	A/A	A/A	A/A	A/A	A/A	A/A	A/A	A/A	A/A	A/A	A/A	A/A	A/A	A/A	A/A	A/A	A/A	A/A	A/A	A/A	A/A	A/A	A/A	N/N	N/N	A/A	A/A	A/A	A/A	A/A	A/A	A/A	A/A	A/A	A/A	A/A	A/A	A/A	A/A	A/A	A/A	A/A	A/A	A/A	A/A
937101	G	C	ANN=C|intergenic_region|MODIFIER|SGE1-ARR1|YPR198W-YPR199C|intergenic_region|YPR198W-YPR199C|||||||||	G/G	G/C	G/G	G/G	G/G	G/G	G/G	C/C	G/G	C/C	G/G	G/G	C/C	C/C	C/C	C/C	G/G	G/G	G/G	C/C	G/G	G/G	C/C	N/N	N/N	N/N	C/C	C/C	G/G	G/G	G/G	C/C	G/C	G/C	G/G	N/N	C/C	G/G	G/G	C/C	G/G	G/G	G/G	C/C	C/C	G/G
937125	C	T	ANN=T|intergenic_region|MODIFIER|SGE1-ARR1|YPR198W-YPR199C|intergenic_region|YPR198W-YPR199C|||||||||	C/C	C/C	C/C	C/C	C/C	C/C	C/C	C/C	C/C	C/C	C/C	C/C	C/C	C/C	C/C	C/C	C/C	C/C	C/C	C/C	C/C	C/C	C/C	N/N	N/N	N/N	C/C	C/C	C/C	C/C	C/C	C/C	C/C	C/C	C/C	N/N	T/T	C/C	C/C	C/C	C/C	C/C	C/C	C/C	C/C	C/C
937126	A	G	ANN=G|intergenic_region|MODIFIER|SGE1-ARR1|YPR198W-YPR199C|intergenic_region|YPR198W-YPR199C|||||||||	A/A	A/G	A/A	A/A	A/A	A/A	A/A	A/A	A/A	A/A	A/A	A/A	A/A	A/A	A/A	A/A	A/A	A/A	A/A	A/A	A/A	A/A	A/A	N/N	N/N	N/N	A/A	A/A	A/A	A/A	A/A	A/A	A/A	A/A	A/A	N/N	A/A	A/A	A/A	A/A	A/A	A/A	A/A	A/A	A/A	A/A
937129	T	C	ANN=C|intergenic_region|MODIFIER|SGE1-ARR1|YPR198W-YPR199C|intergenic_region|YPR198W-YPR199C|||||||||	T/T	T/T	T/T	T/T	T/T	T/T	T/T	T/T	T/T	T/T	T/T	T/T	T/T	T/T	T/T	T/T	T/T	T/T	T/T	T/T	T/T	T/T	T/T	N/N	N/N	N/N	T/T	T/T	T/T	T/T	T/T	T/T	T/T	T/T	T/T	N/N	T/T	T/T	T/T	T/T	T/T	T/T	T/T	T/T	T/T	T/T
937136	T	C	ANN=C|intergenic_region|MODIFIER|SGE1-ARR1|YPR198W-YPR199C|intergenic_region|YPR198W-YPR199C|||||||||	T/T	T/T	T/T	T/T	T/T	T/T	T/T	T/T	T/T	T/T	T/T	T/T	T/T	T/T	T/T	T/T	T/T	T/T	T/T	T/T	T/T	T/T	T/T	T/T	N/N	N/N	T/T	T/T	T/T	T/T	T/T	T/T	T/T	T/T	T/T	N/N	T/T	T/T	T/T	T/T	T/T	T/T	T/T	T/T	T/T	T/T
937144	G	A	ANN=A|intergenic_region|MODIFIER|SGE1-ARR1|YPR198W-YPR199C|intergenic_region|YPR198W-YPR199C|||||||||	G/G	G/G	G/G	G/G	G/G	G/G	G/G	G/G	G/G	G/G	G/G	G/G	G/G	G/G	G/G	G/G	G/G	G/G	G/G	G/G	G/G	G/G	G/G	G/G	N/N	N/N	G/G	G/G	G/G	G/G	G/G	G/G	G/G	G/G	G/G	N/N	G/G	G/G	G/G	G/G	G/G	G/G	G/G	G/G	G/G	G/G
937159	C	T	ANN=T|intergenic_region|MODIFIER|SGE1-ARR1|YPR198W-YPR199C|intergenic_region|YPR198W-YPR199C|||||||||	C/C	C/C	C/C	C/C	C/C	C/C	C/C	C/C	C/C	C/C	C/C	C/C	T/T	C/C	C/C	C/C	C/C	C/C	C/C	C/C	C/C	C/C	T/T	C/C	N/N	N/N	C/C	C/C	C/C	C/C	C/C	C/C	C/C	C/C	C/C	N/N	C/C	C/C	C/C	C/C	C/C	C/C	C/C	C/C	C/C	C/C
937175	C	T	ANN=T|intergenic_region|MODIFIER|SGE1-ARR1|YPR198W-YPR199C|intergenic_region|YPR198W-YPR199C|||||||||	C/C	C/C	C/C	C/C	C/C	C/C	C/C	T/T	C/C	C/C	C/C	C/C	C/C	C/C	C/C	C/C	C/C	C/C	C/C	T/T	C/C	C/C	C/C	C/C	N/N	N/N	C/C	C/C	C/C	C/C	C/C	C/C	C/C	C/C	C/C	N/N	C/C	C/C	C/C	T/T	C/C	C/C	C/C	C/C	C/C	C/C
937184	T	C	ANN=C|intergenic_region|MODIFIER|SGE1-ARR1|YPR198W-YPR199C|intergenic_region|YPR198W-YPR199C|||||||||	T/T	T/T	T/T	T/T	T/T	T/T	T/T	T/T	T/T	T/T	T/T	T/T	T/T	T/C	T/T	T/C	T/T	T/T	T/T	T/T	T/T	T/T	T/T	T/T	N/N	N/N	T/T	T/T	T/T	T/T	T/T	T/T	T/C	T/T	T/T	N/N	T/T	T/T	T/T	T/T	T/T	T/T	T/T	T/T	T/T	T/T
937188	C	T	ANN=T|intergenic_region|MODIFIER|SGE1-ARR1|YPR198W-YPR199C|intergenic_region|YPR198W-YPR199C|||||||||	C/C	C/C	C/C	C/C	C/C	C/C	C/C	C/C	C/C	C/C	C/C	C/C	C/C	C/C	C/C	C/C	C/C	C/C	C/C	C/C	C/C	C/C	C/C	C/C	N/N	N/N	C/C	C/C	C/C	C/C	C/C	C/C	C/C	C/C	C/C	N/N	C/C	C/C	C/C	C/C	C/C	C/C	C/C	C/C	C/C	C/C
937195	A	C	ANN=C|intergenic_region|MODIFIER|SGE1-ARR1|YPR198W-YPR199C|intergenic_region|YPR198W-YPR199C|||||||||	A/A	A/A	A/A	A/A	A/A	A/A	C/C	A/A	A/A	A/A	A/A	A/A	A/A	A/A	A/A	A/A	A/A	A/A	A/A	A/A	A/A	A/A	A/A	A/A	N/N	N/N	A/A	A/A	A/A	A/A	A/A	A/A	A/A	A/A	A/A	N/N	A/A	A/A	A/A	A/A	A/A	A/A	A/A	A/A	A/A	A/A
937209	G	A	ANN=A|intergenic_region|MODIFIER|SGE1-ARR1|YPR198W-YPR199C|intergenic_region|YPR198W-YPR199C|||||||||	G/G	G/G	A/A	G/G	G/G	G/G	G/G	G/G	G/G	G/G	A/A	G/G	G/G	G/G	G/G	G/G	G/G	G/G	G/G	G/G	G/G	A/A	G/G	G/G	N/N	N/N	G/G	G/G	G/G	G/G	A/A	G/G	G/G	G/A	A/A	N/N	G/G	G/G	G/G	G/G	A/A	A/A	A/A	G/G	G/G	G/G
937231	A	T	ANN=T|intergenic_region|MODIFIER|SGE1-ARR1|YPR198W-YPR199C|intergenic_region|YPR198W-YPR199C|||||||||	A/A	A/A	A/A	A/A	A/A	A/A	T/T	A/A	A/A	A/A	A/A	A/A	A/A	A/A	A/A	A/A	A/A	A/A	A/A	A/A	A/A	A/A	A/A	A/A	N/N	N/N	T/T	A/A	A/A	A/A	A/A	A/A	A/A	A/A	A/A	N/N	A/A	A/A	A/A	A/A	A/A	A/A	A/A	A/A	A/A	A/A
937257	A	G	ANN=G|intergenic_region|MODIFIER|SGE1-ARR1|YPR198W-YPR199C|intergenic_region|YPR198W-YPR199C|||||||||	A/A	A/A	A/A	A/A	A/A	A/A	A/A	A/A	A/A	A/A	A/A	A/A	A/A	A/A	A/A	A/A	A/A	A/A	A/A	A/A	A/A	A/A	A/A	A/A	N/N	N/N	A/A	G/G	A/A	A/A	A/A	A/A	A/A	A/G	A/A	N/N	A/A	A/A	A/A	A/A	A/A	A/A	A/A	G/G	A/G	A/A
937294	G	A	ANN=A|intergenic_region|MODIFIER|SGE1-ARR1|YPR198W-YPR199C|intergenic_region|YPR198W-YPR199C|||||||||	G/G	G/G	G/G	G/G	G/G	G/G	G/G	A/A	G/G	G/G	G/G	G/G	G/G	G/G	G/G	G/G	G/G	G/G	G/G	A/A	G/G	G/G	G/G	G/G	N/N	N/N	G/G	G/G	G/G	G/G	G/G	G/G	G/G	G/G	G/G	G/G	G/G	G/G	G/G	A/A	G/G	G/G	G/G	G/G	G/G	G/G
937295	T	C	ANN=C|intergenic_region|MODIFIER|SGE1-ARR1|YPR198W-YPR199C|intergenic_region|YPR198W-YPR199C|||||||||	T/T	T/T	T/T	T/T	T/T	T/T	T/T	T/T	T/T	T/T	T/T	T/T	T/T	T/T	T/T	T/T	T/T	T/T	T/T	T/T	T/T	T/T	T/T	T/T	N/N	N/N	T/T	T/T	T/T	T/T	T/T	T/T	T/T	T/T	T/T	T/T	T/T	T/T	T/T	T/T	T/T	T/T	T/T	T/T	T/T	T/T
937303	G	T	ANN=T|intergenic_region|MODIFIER|SGE1-ARR1|YPR198W-YPR199C|intergenic_region|YPR198W-YPR199C|||||||||	G/G	G/G	G/G	G/G	G/G	G/G	G/G	G/G	G/G	G/G	G/G	G/G	G/G	G/G	G/G	G/G	G/G	G/G	G/G	G/G	G/G	G/G	G/G	G/G	N/N	N/N	T/T	G/G	G/G	G/G	G/G	G/G	G/G	G/G	G/G	G/G	G/G	G/G	G/G	G/G	G/G	G/G	G/G	G/G	G/G	G/G
937324	T	C	ANN=C|intergenic_region|MODIFIER|SGE1-ARR1|YPR198W-YPR199C|intergenic_region|YPR198W-YPR199C|||||||||	T/C	T/C	T/T	T/T	T/T	T/T	C/C	C/C	T/T	C/C	T/T	C/C	C/C	C/C	C/C	C/C	T/T	T/T	T/T	C/C	T/T	T/T	C/C	N/N	N/N	N/N	C/C	C/C	T/T	T/T	T/T	C/C	C/C	T/C	T/T	T/T	C/C	C/C	T/T	C/C	T/T	T/T	T/T	C/C	C/C	C/C
937341	C	A	ANN=A|intergenic_region|MODIFIER|SGE1-ARR1|YPR198W-YPR199C|intergenic_region|YPR198W-YPR199C|||||||||	C/C	C/C	C/C	C/C	C/C	C/C	C/C	C/C	C/C	C/C	C/C	C/C	C/C	C/C	C/C	C/C	C/C	C/C	C/C	C/C	C/C	C/C	C/C	N/N	N/N	N/N	C/C	C/C	C/C	C/C	C/C	C/C	C/C	C/C	C/C	N/N	C/C	C/C	C/C	C/C	C/C	C/C	C/C	C/C	C/C	C/C
937367	G	C	ANN=C|intergenic_region|MODIFIER|SGE1-ARR1|YPR198W-YPR199C|intergenic_region|YPR198W-YPR199C|||||||||	G/G	G/G	G/G	G/G	G/G	G/G	G/G	G/G	G/G	G/G	G/G	G/G	G/G	G/G	G/G	G/G	G/G	G/G	G/G	G/G	G/G	G/G	G/G	N/N	N/N	N/N	G/G	G/G	G/G	G/G	G/G	G/G	G/G	G/G	G/G	N/N	G/G	G/G	G/G	G/G	G/G	G/G	G/G	G/G	G/G	G/G
937373	A	G	ANN=G|intergenic_region|MODIFIER|SGE1-ARR1|YPR198W-YPR199C|intergenic_region|YPR198W-YPR199C|||||||||	A/A	A/G	A/A	A/A	A/A	A/A	G/G	G/G	A/A	G/G	A/A	A/A	G/G	G/G	G/G	G/G	A/A	A/A	A/A	G/G	A/A	A/A	G/G	N/N	N/N	N/N	G/G	G/G	A/A	A/A	A/A	G/G	A/G	A/G	A/A	N/N	G/G	A/A	A/A	G/G	A/A	A/A	A/A	G/G	G/G	A/A
937381	T	C	ANN=C|intergenic_region|MODIFIER|SGE1-ARR1|YPR198W-YPR199C|intergenic_region|YPR198W-YPR199C|||||||||	T/T	T/T	T/T	T/T	T/T	T/T	T/T	T/T	T/T	T/T	T/T	C/C	T/T	T/T	T/T	T/T	T/T	T/T	T/T	T/T	T/T	T/T	T/T	N/N	N/N	N/N	T/T	T/T	T/T	T/T	T/T	T/T	T/T	T/T	T/T	N/N	T/T	C/C	T/T	T/T	T/T	T/T	T/T	T/T	T/T	T/T
937402	A	G	ANN=G|intergenic_region|MODIFIER|SGE1-ARR1|YPR198W-YPR199C|intergenic_region|YPR198W-YPR199C|||||||||	A/A	A/A	A/A	A/A	A/A	A/A	A/A	A/A	A/A	A/A	A/A	A/A	A/A	A/A	A/A	A/A	A/A	A/A	A/A	A/A	A/A	A/A	A/A	N/N	N/N	N/N	A/A	A/A	A/A	A/A	A/A	A/A	A/A	A/A	A/A	N/N	A/A	A/A	A/A	A/A	A/A	A/A	A/A	A/A	A/A	A/A
937462	C	T	ANN=T|intergenic_region|MODIFIER|SGE1-ARR1|YPR198W-YPR199C|intergenic_region|YPR198W-YPR199C|||||||||	C/T	C/C	C/C	C/C	C/C	C/C	C/C	C/C	C/C	C/C	C/C	C/C	C/C	C/C	C/C	C/C	C/C	C/C	C/C	C/C	C/C	C/C	C/C	C/C	N/N	N/N	C/C	C/C	C/C	C/C	C/C	C/C	C/C	C/C	C/C	N/N	C/C	C/C	C/C	C/C	C/C	C/C	C/C	C/C	C/C	C/C
937470	A	C	ANN=C|intergenic_region|MODIFIER|SGE1-ARR1|YPR198W-YPR199C|intergenic_region|YPR198W-YPR199C|||||||||	A/A	A/C	A/A	A/A	A/A	A/A	C/C	C/C	A/A	C/C	A/A	A/A	C/C	C/C	C/C	C/C	A/A	A/A	A/A	C/C	A/A	A/A	C/C	A/A	N/N	N/N	C/C	C/C	A/A	A/A	A/A	C/C	A/C	A/C	A/A	N/N	C/C	A/A	A/A	C/C	A/A	A/A	A/A	C/C	C/C	A/A
937500	T	G	ANN=G|intergenic_region|MODIFIER|SGE1-ARR1|YPR198W-YPR199C|intergenic_region|YPR198W-YPR199C|||||||||	T/T	T/T	T/T	T/T	T/T	T/T	T/T	T/T	T/T	T/T	T/T	T/T	T/T	T/T	T/T	T/T	T/T	T/T	T/T	T/T	T/T	T/T	T/T	T/T	N/N	N/N	T/T	T/T	T/T	T/T	T/T	T/T	T/T	T/T	T/T	N/N	T/T	T/T	T/T	T/T	T/T	T/T	T/T	T/T	T/T	T/T
937542	G	A	ANN=A|intergenic_region|MODIFIER|SGE1-ARR1|YPR198W-YPR199C|intergenic_region|YPR198W-YPR199C|||||||||	G/G	G/A	G/G	G/G	G/G	G/G	A/A	A/A	G/G	A/A	G/G	G/G	A/A	A/A	A/A	A/A	G/G	G/G	G/G	A/A	G/G	G/G	A/A	N/N	N/N	N/N	A/A	A/A	G/G	G/G	G/G	A/A	G/A	G/A	G/G	N/N	A/A	G/G	G/G	A/A	G/G	G/G	G/G	A/A	A/A	G/G
937548	G	T	ANN=T|intergenic_region|MODIFIER|SGE1-ARR1|YPR198W-YPR199C|intergenic_region|YPR198W-YPR199C|||||||||	G/G	G/G	G/G	G/G	G/G	G/G	G/G	G/G	G/G	G/G	G/G	G/G	G/G	G/G	G/G	G/G	G/G	G/G	G/G	G/G	G/G	G/G	G/G	N/N	N/N	N/N	G/G	G/G	G/G	G/G	G/G	G/G	G/G	G/G	G/G	N/N	G/G	G/G	G/G	G/G	G/G	G/G	G/G	G/G	G/G	G/G
937552	G	A	ANN=A|intergenic_region|MODIFIER|SGE1-ARR1|YPR198W-YPR199C|intergenic_region|YPR198W-YPR199C|||||||||	G/G	G/G	G/G	G/G	G/G	G/G	A/A	G/G	G/G	G/G	G/G	G/G	G/G	G/G	G/G	G/G	G/G	G/G	G/G	G/G	G/G	G/G	G/G	N/N	N/N	N/N	G/G	G/G	G/G	G/G	G/G	G/G	G/G	G/G	G/G	N/N	G/G	G/G	G/G	G/G	G/G	G/G	G/G	G/G	G/G	G/G
937559	A	G	ANN=G|intergenic_region|MODIFIER|SGE1-ARR1|YPR198W-YPR199C|intergenic_region|YPR198W-YPR199C|||||||||	A/A	A/A	A/A	A/A	A/A	A/A	A/A	G/G	A/A	A/A	A/A	A/A	A/A	A/A	A/A	A/A	A/A	A/A	A/A	G/G	A/A	A/A	A/A	N/N	N/N	N/N	A/A	A/A	A/A	A/A	A/A	A/A	A/A	A/A	A/A	N/N	A/A	A/A	A/A	G/G	A/A	A/A	A/A	A/A	A/A	A/A
937584	C	T	ANN=T|intergenic_region|MODIFIER|SGE1-ARR1|YPR198W-YPR199C|intergenic_region|YPR198W-YPR199C|||||||||	C/C	C/C	C/C	C/C	C/C	C/C	C/C	T/T	C/C	C/C	C/C	C/C	C/C	C/C	C/C	C/C	C/C	C/C	C/C	T/T	C/C	C/C	C/C	N/N	N/N	N/N	C/C	C/C	C/C	C/C	C/C	C/C	C/C	C/C	C/C	N/N	C/C	C/C	C/C	T/T	C/C	C/C	C/C	C/C	C/C	C/C
937599	G	A	ANN=A|intergenic_region|MODIFIER|SGE1-ARR1|YPR198W-YPR199C|intergenic_region|YPR198W-YPR199C|||||||||	G/A	G/G	G/G	G/G	G/G	G/G	G/G	G/G	G/G	G/G	G/G	G/G	G/G	G/G	G/G	G/G	G/G	G/G	G/G	G/G	G/G	G/G	G/G	N/N	N/N	N/N	G/G	G/G	G/G	G/G	G/G	G/G	G/G	G/G	G/G	N/N	G/G	G/G	G/G	G/G	G/G	G/G	G/G	G/G	G/G	G/G
937628	G	A	ANN=A|intergenic_region|MODIFIER|SGE1-ARR1|YPR198W-YPR199C|intergenic_region|YPR198W-YPR199C|||||||||	G/G	G/G	G/G	G/G	G/G	G/G	G/G	G/G	G/G	G/G	G/G	A/A	G/G	G/G	G/G	G/G	G/G	G/G	G/G	G/G	G/G	G/G	G/G	N/N	N/N	N/N	G/G	G/G	G/G	G/G	G/G	G/G	G/G	G/G	G/G	N/N	G/G	A/A	G/G	G/G	G/G	G/G	G/G	G/G	G/G	G/G
937636	A	T	ANN=T|intergenic_region|MODIFIER|SGE1-ARR1|YPR198W-YPR199C|intergenic_region|YPR198W-YPR199C|||||||||	A/A	A/T	A/A	A/A	A/A	A/A	A/A	A/A	A/A	A/A	A/A	A/A	A/A	A/A	A/A	A/A	A/A	A/A	A/A	A/A	A/A	A/A	A/A	N/N	N/N	N/N	A/A	A/A	A/A	A/A	A/A	A/A	A/A	A/A	A/A	N/N	A/A	A/A	A/A	A/A	A/A	A/A	A/A	A/A	A/A	A/A
937649	C	T	ANN=T|intergenic_region|MODIFIER|SGE1-ARR1|YPR198W-YPR199C|intergenic_region|YPR198W-YPR199C|||||||||	C/C	C/C	C/C	C/C	C/C	C/C	C/C	C/C	C/C	C/C	C/C	C/C	C/C	C/C	C/C	C/C	C/C	C/C	C/C	C/C	C/C	C/C	C/C	N/N	N/N	N/N	C/C	C/C	C/C	C/C	C/C	C/C	C/C	C/C	C/C	C/C	C/C	C/C	C/C	C/C	C/C	C/C	C/C	C/C	C/C	C/C
937658	C	T	ANN=T|intergenic_region|MODIFIER|SGE1-ARR1|YPR198W-YPR199C|intergenic_region|YPR198W-YPR199C|||||||||	C/C	C/C	C/C	C/C	C/C	C/C	T/T	C/C	C/C	C/C	C/C	C/C	C/C	C/C	C/C	C/C	C/C	C/C	C/C	C/C	C/C	C/C	C/C	N/N	N/N	N/N	C/C	C/C	C/C	C/C	C/C	C/C	C/C	C/C	C/C	C/C	C/C	C/C	C/C	C/C	C/C	C/C	C/C	C/C	C/C	C/C
937676	G	A	ANN=A|intergenic_region|MODIFIER|SGE1-ARR1|YPR198W-YPR199C|intergenic_region|YPR198W-YPR199C|||||||||	G/G	G/G	G/G	G/G	G/G	G/G	G/G	G/G	G/G	G/G	G/G	A/A	G/G	G/G	G/G	G/G	G/G	G/G	G/G	G/G	G/G	G/G	G/G	G/G	N/N	N/N	G/G	G/G	G/G	G/G	G/G	G/G	G/G	G/G	G/G	G/G	G/G	A/A	G/G	G/G	G/G	G/G	G/G	G/G	G/G	G/G
937688	C	T	ANN=T|intergenic_region|MODIFIER|SGE1-ARR1|YPR198W-YPR199C|intergenic_region|YPR198W-YPR199C|||||||||	C/C	C/C	C/C	C/C	C/C	C/C	C/C	C/C	C/C	C/C	C/C	C/C	C/C	C/C	C/C	C/C	C/C	C/C	C/C	C/C	C/C	C/C	C/C	C/C	N/N	N/N	C/C	C/C	C/C	C/C	C/C	C/C	C/C	C/C	C/C	C/C	C/C	C/C	C/C	C/C	C/C	C/C	C/C	C/C	C/C	C/C
937701	A	T	ANN=T|intergenic_region|MODIFIER|SGE1-ARR1|YPR198W-YPR199C|intergenic_region|YPR198W-YPR199C|||||||||	A/A	A/T	A/A	A/A	A/A	A/A	A/A	T/T	A/A	T/T	A/A	A/A	T/T	T/T	T/T	T/T	A/A	A/A	A/A	T/T	A/A	A/T	T/T	A/A	N/N	N/N	T/T	T/T	A/A	A/A	A/A	T/T	A/T	A/T	A/A	T/T	T/T	A/A	A/A	T/T	A/A	A/A	A/A	T/T	T/T	A/A
937709	C	T	ANN=T|intergenic_region|MODIFIER|SGE1-ARR1|YPR198W-YPR199C|intergenic_region|YPR198W-YPR199C|||||||||	C/C	C/C	C/C	C/C	C/C	C/C	C/C	C/C	C/C	C/C	C/C	C/C	C/C	C/C	C/C	C/C	C/C	C/C	C/C	C/C	C/C	C/C	C/C	C/C	N/N	N/N	C/C	C/C	C/C	C/C	C/C	C/C	C/C	C/C	C/C	C/C	C/C	C/C	C/C	C/C	C/C	C/C	C/C	C/C	C/C	C/C
937715	C	G	ANN=G|intergenic_region|MODIFIER|SGE1-ARR1|YPR198W-YPR199C|intergenic_region|YPR198W-YPR199C|||||||||	C/C	C/C	C/C	C/C	C/C	C/C	C/C	C/C	C/C	C/C	C/C	C/C	C/C	C/C	C/C	C/C	C/C	C/C	C/C	C/C	C/C	C/C	C/C	C/C	N/N	N/N	C/C	C/C	C/C	C/C	C/C	C/C	C/C	C/C	C/C	N/N	C/C	C/C	C/C	C/C	C/C	C/C	C/C	C/C	C/C	C/C
937724	A	G	ANN=G|intergenic_region|MODIFIER|SGE1-ARR1|YPR198W-YPR199C|intergenic_region|YPR198W-YPR199C|||||||||	A/G	A/A	A/A	A/A	A/A	A/A	A/A	A/A	A/A	A/A	A/A	A/A	A/A	A/A	A/A	A/A	A/A	A/A	A/A	A/A	A/A	A/A	A/A	A/A	N/N	N/N	A/A	A/A	A/A	A/A	A/A	A/A	A/G	A/A	A/A	N/N	A/A	A/A	A/A	A/A	A/A	A/A	A/A	A/A	A/A	G/G
937734	C	T	ANN=T|intergenic_region|MODIFIER|SGE1-ARR1|YPR198W-YPR199C|intergenic_region|YPR198W-YPR199C|||||||||	C/C	C/C	C/C	C/C	C/C	C/C	C/C	C/C	C/C	C/C	C/C	C/C	C/C	C/C	C/C	C/C	C/C	C/C	C/C	C/C	C/C	C/C	C/C	C/C	N/N	N/N	C/C	C/C	C/C	C/C	C/C	C/C	C/C	C/C	C/C	N/N	C/C	C/C	C/C	C/C	C/C	C/C	C/C	C/C	C/C	C/C
937737	G	A	ANN=A|intergenic_region|MODIFIER|SGE1-ARR1|YPR198W-YPR199C|intergenic_region|YPR198W-YPR199C|||||||||	G/A	G/G	G/G	G/G	G/G	G/G	G/G	G/G	G/G	G/G	G/G	G/G	G/G	G/G	G/G	G/G	G/G	G/G	G/G	G/G	G/G	G/G	G/G	G/G	N/N	N/N	G/G	G/G	G/G	G/G	G/G	G/G	G/G	G/G	G/G	N/N	G/G	G/G	G/G	G/G	G/G	G/G	G/G	G/G	G/G	A/A
937774	G	A	ANN=A|intergenic_region|MODIFIER|SGE1-ARR1|YPR198W-YPR199C|intergenic_region|YPR198W-YPR199C|||||||||	G/G	G/A	G/G	G/G	G/G	G/G	G/G	A/A	G/G	A/A	G/G	G/G	A/A	A/A	A/A	A/A	G/G	G/G	G/G	A/A	G/G	G/A	A/A	G/G	N/N	N/N	A/A	A/A	G/G	G/G	G/G	A/A	G/A	G/A	G/G	N/N	A/A	G/G	G/G	A/A	G/G	G/G	G/G	A/A	A/A	G/G
937780	A	G	ANN=G|intergenic_region|MODIFIER|SGE1-ARR1|YPR198W-YPR199C|intergenic_region|YPR198W-YPR199C|||||||||	A/A	A/A	A/A	A/A	A/A	A/A	A/A	G/G	A/A	A/A	A/A	A/A	A/A	A/A	A/A	A/A	A/A	A/A	A/A	G/G	A/A	A/A	A/A	A/A	N/N	N/N	G/G	A/A	A/A	A/A	A/A	A/A	A/A	A/A	A/A	N/N	A/A	A/A	A/A	G/G	A/A	A/A	A/A	A/A	A/A	A/A
937788	A	G	ANN=G|intergenic_region|MODIFIER|SGE1-ARR1|YPR198W-YPR199C|intergenic_region|YPR198W-YPR199C|||||||||	A/A	A/A	A/A	A/A	A/A	A/A	A/A	G/G	A/A	A/A	A/A	A/A	A/A	A/A	A/A	A/A	A/A	A/A	A/A	G/G	A/A	A/A	A/A	A/A	N/N	N/N	A/A	A/A	A/A	A/A	A/A	A/A	A/A	A/A	A/A	N/N	A/A	A/A	A/A	G/G	A/A	A/A	A/A	A/A	A/A	A/A
937790	A	G	ANN=G|intergenic_region|MODIFIER|SGE1-ARR1|YPR198W-YPR199C|intergenic_region|YPR198W-YPR199C|||||||||	A/A	A/G	A/A	A/A	A/A	A/A	A/A	G/G	A/A	G/G	A/A	A/A	G/G	G/G	G/G	G/G	A/A	A/A	A/A	G/G	A/A	A/G	G/G	A/A	N/N	N/N	G/G	G/G	A/A	A/A	A/A	G/G	A/G	A/G	A/A	N/N	G/G	A/A	A/A	G/G	A/A	A/A	A/A	G/G	G/G	A/A
937792	G	T	ANN=T|intergenic_region|MODIFIER|SGE1-ARR1|YPR198W-YPR199C|intergenic_region|YPR198W-YPR199C|||||||||	G/G	G/G	G/G	G/G	G/G	G/G	G/G	G/G	G/G	G/G	G/G	G/G	G/G	G/G	G/G	G/G	G/G	G/G	G/G	G/G	G/G	G/G	G/G	G/G	N/N	N/N	G/G	G/G	G/G	G/G	G/G	G/G	G/G	G/G	G/G	N/N	G/G	G/G	G/G	G/G	G/G	G/G	G/G	G/G	G/G	G/G
937822	G	T	ANN=T|intergenic_region|MODIFIER|SGE1-ARR1|YPR198W-YPR199C|intergenic_region|YPR198W-YPR199C|||||||||	G/G	G/T	G/G	G/G	G/G	G/G	G/G	T/T	G/G	T/T	G/G	G/G	T/T	T/T	T/T	T/T	G/G	G/G	G/G	T/T	G/G	G/G	T/T	G/G	N/N	N/N	T/T	T/T	G/G	G/G	G/G	T/T	G/T	G/T	G/G	N/N	T/T	G/G	G/G	T/T	G/G	G/G	G/G	T/T	T/T	G/G
937828	G	A	ANN=A|intergenic_region|MODIFIER|SGE1-ARR1|YPR198W-YPR199C|intergenic_region|YPR198W-YPR199C|||||||||	G/G	G/G	G/G	G/G	G/G	G/G	G/G	G/G	G/G	G/G	G/G	G/G	G/G	G/G	G/G	G/G	G/G	G/G	G/G	G/G	G/G	G/G	G/G	G/G	N/N	N/N	G/G	G/G	G/G	G/G	G/G	G/G	G/G	G/G	G/G	N/N	G/G	G/G	G/G	G/G	G/G	G/G	G/G	G/G	G/G	G/G
937846	C	A	ANN=A|intergenic_region|MODIFIER|SGE1-ARR1|YPR198W-YPR199C|intergenic_region|YPR198W-YPR199C|||||||||	C/C	C/C	C/C	C/C	C/C	C/C	C/C	C/C	C/C	C/C	C/C	C/C	C/C	C/C	C/C	C/C	C/C	C/C	C/C	C/C	C/C	C/C	C/C	C/C	N/N	N/N	C/C	C/C	C/C	C/C	C/C	C/C	C/C	C/C	C/C	N/N	C/C	C/C	C/C	A/A	C/C	C/C	C/C	C/C	C/C	C/C
937854	G	T	ANN=T|intergenic_region|MODIFIER|SGE1-ARR1|YPR198W-YPR199C|intergenic_region|YPR198W-YPR199C|||||||||	G/G	G/T	G/G	G/G	G/G	G/T	G/G	T/T	G/G	T/T	G/T	G/G	T/T	T/T	T/T	T/T	G/G	G/G	G/G	T/T	G/G	G/G	T/T	G/G	N/N	N/N	T/T	T/T	G/G	G/G	G/T	T/T	G/T	G/T	G/G	N/N	T/T	G/G	G/G	T/T	G/G	G/G	G/G	T/T	T/T	G/G
937863	C	T	ANN=T|intergenic_region|MODIFIER|SGE1-ARR1|YPR198W-YPR199C|intergenic_region|YPR198W-YPR199C|||||||||	C/C	C/C	C/C	C/C	C/C	C/C	C/C	C/C	C/C	C/C	C/C	C/C	C/C	C/C	C/C	C/C	C/C	C/C	C/C	C/C	C/C	C/C	C/C	C/C	N/N	N/N	C/C	C/C	C/C	C/C	C/C	C/C	C/C	C/C	C/C	N/N	C/C	C/C	C/C	C/C	C/C	C/C	C/C	C/C	C/C	C/C
938003	A	G	ANN=G|intergenic_region|MODIFIER|SGE1-ARR1|YPR198W-YPR199C|intergenic_region|YPR198W-YPR199C|||||||||	A/G	A/A	A/A	A/A	A/A	A/A	A/A	A/A	A/A	A/A	A/A	A/A	A/A	A/A	A/A	A/A	A/A	A/A	A/A	A/A	A/A	A/A	A/A	A/A	N/N	N/N	A/A	A/A	A/A	A/A	A/A	A/A	A/A	A/A	A/A	A/A	A/A	A/A	A/A	A/A	A/A	A/A	A/A	A/A	A/A	A/G
938035	A	G	ANN=G|intergenic_region|MODIFIER|SGE1-ARR1|YPR198W-YPR199C|intergenic_region|YPR198W-YPR199C|||||||||	A/A	A/A	A/A	A/A	A/A	A/A	A/A	G/G	A/A	A/A	A/A	A/A	A/A	A/A	A/A	A/A	A/A	A/A	A/A	G/G	A/A	A/A	A/A	N/N	N/N	N/N	A/A	A/A	A/A	A/A	A/A	A/A	A/A	A/A	A/A	A/A	A/A	A/A	A/A	G/G	A/A	A/A	A/A	A/A	A/A	A/A
938071	T	A,G	ANN=A|intergenic_region|MODIFIER|SGE1-ARR1|YPR198W-YPR199C|intergenic_region|YPR198W-YPR199C|||||||||,G|intergenic_region|MODIFIER|SGE1-ARR1|YPR198W-YPR199C|intergenic_region|YPR198W-YPR199C|||||||||	T/T	T/G	T/T	T/T	T/T	T/T	T/T	G/G	T/T	G/G	T/T	T/T	G/G	G/G	G/G	G/G	T/T	T/T	T/T	G/G	T/T	T/T	G/G	N/N	N/N	N/N	G/G	G/G	T/T	T/T	T/T	A,G/A,G	T/G	T/G	T/T	G/G	G/G	T/T	T/T	G/G	T/T	T/T	T/T	G/G	G/G	T/T
938075	T	C	ANN=C|intergenic_region|MODIFIER|SGE1-ARR1|YPR198W-YPR199C|intergenic_region|YPR198W-YPR199C|||||||||	T/T	T/T	T/T	T/T	T/T	T/T	T/T	T/T	T/T	T/T	T/T	C/C	T/T	T/T	T/T	T/T	T/T	T/T	T/T	T/T	T/T	T/T	T/T	N/N	N/N	N/N	T/T	T/T	T/T	T/T	T/T	T/T	T/T	T/T	T/T	T/T	T/T	C/C	T/T	T/T	T/T	T/T	T/T	T/T	T/T	T/C
938082	T	G	ANN=G|intergenic_region|MODIFIER|SGE1-ARR1|YPR198W-YPR199C|intergenic_region|YPR198W-YPR199C|||||||||	T/T	T/T	G/G	T/T	T/T	T/T	T/T	T/T	T/T	T/T	T/T	T/T	T/T	T/T	T/T	T/T	T/T	T/T	T/T	T/T	T/T	G/G	T/T	N/N	N/N	N/N	T/T	T/T	T/T	T/T	G/G	T/T	T/T	T/T	G/G	N/N	T/T	T/T	T/T	T/T	T/T	T/T	T/T	T/T	T/T	T/T
938084	C	T	ANN=T|intergenic_region|MODIFIER|SGE1-ARR1|YPR198W-YPR199C|intergenic_region|YPR198W-YPR199C|||||||||	C/C	C/C	C/C	C/C	C/C	C/C	C/C	C/C	C/C	C/C	C/C	C/C	C/C	C/C	C/C	C/C	C/C	C/C	C/C	C/C	C/C	C/C	C/C	N/N	N/N	N/N	C/C	C/C	C/C	C/C	C/C	C/C	C/C	C/C	C/C	N/N	C/C	C/C	C/C	C/C	C/C	C/C	C/C	C/C	C/C	C/C
938107	A	T	ANN=T|intergenic_region|MODIFIER|SGE1-ARR1|YPR198W-YPR199C|intergenic_region|YPR198W-YPR199C|||||||||	A/T	A/T	A/A	A/A	A/A	A/A	A/A	T/T	A/A	T/T	A/A	T/T	T/T	T/T	T/T	T/T	A/A	A/A	A/A	T/T	A/A	A/A	T/T	N/N	N/N	N/N	T/T	T/T	A/A	A/A	A/A	T/T	T/T	A/T	A/A	N/N	T/T	T/T	A/A	T/T	A/A	A/A	A/A	T/T	T/T	T/T
938109	T	C	ANN=C|intergenic_region|MODIFIER|SGE1-ARR1|YPR198W-YPR199C|intergenic_region|YPR198W-YPR199C|||||||||	T/T	T/T	T/T	T/T	T/T	T/T	T/T	C/C	T/T	T/T	T/T	T/T	T/T	T/T	T/T	T/T	T/T	T/T	T/T	C/C	T/T	T/T	T/T	N/N	N/N	N/N	T/T	T/T	T/T	T/T	T/T	T/T	T/T	T/T	T/T	N/N	T/T	T/T	T/T	C/C	T/T	T/T	T/T	T/T	T/T	T/T
938118	C	G	ANN=G|intergenic_region|MODIFIER|SGE1-ARR1|YPR198W-YPR199C|intergenic_region|YPR198W-YPR199C|||||||||	C/C	C/C	C/C	C/C	C/C	C/C	C/C	C/C	C/C	C/C	C/C	G/G	C/C	C/C	C/C	C/C	C/C	C/C	C/C	C/C	C/C	C/C	C/C	N/N	N/N	N/N	C/C	C/C	C/C	C/C	C/C	C/C	C/C	C/C	C/C	N/N	C/C	G/G	C/C	C/C	C/C	C/C	C/C	C/C	C/C	C/C
938122	G	A	ANN=A|intergenic_region|MODIFIER|SGE1-ARR1|YPR198W-YPR199C|intergenic_region|YPR198W-YPR199C|||||||||	G/G	G/G	G/G	G/G	G/G	G/G	G/G	A/A	G/G	G/G	G/G	G/G	G/G	G/G	G/G	G/G	G/G	G/G	G/G	A/A	G/G	G/G	G/G	N/N	N/N	N/N	G/G	G/G	G/G	G/G	G/G	G/G	G/G	G/G	G/G	N/N	G/G	G/G	G/G	A/A	G/G	G/G	G/G	G/G	G/G	G/G
938127	G	A	ANN=A|intergenic_region|MODIFIER|SGE1-ARR1|YPR198W-YPR199C|intergenic_region|YPR198W-YPR199C|||||||||	G/A	G/G	G/G	G/G	G/G	G/G	G/G	G/G	G/G	G/G	G/G	G/G	G/G	G/G	G/G	G/G	G/G	G/G	G/G	G/G	G/G	G/G	G/G	N/N	N/N	N/N	G/G	G/G	G/G	G/G	G/G	G/G	G/G	G/G	G/G	N/N	G/G	G/G	G/G	G/G	G/G	G/G	G/G	G/G	G/G	G/A
938130	G	A	ANN=A|intergenic_region|MODIFIER|SGE1-ARR1|YPR198W-YPR199C|intergenic_region|YPR198W-YPR199C|||||||||	G/G	G/G	G/G	G/G	G/G	G/G	G/G	G/G	G/G	G/G	G/G	G/G	G/G	G/G	G/G	G/G	G/G	G/G	G/G	G/G	G/G	G/G	G/G	N/N	N/N	N/N	G/G	G/G	G/G	G/G	G/G	G/G	G/G	G/G	G/G	N/N	G/G	G/G	G/G	G/G	G/G	G/G	G/G	G/G	G/G	G/G
938143	G	A	ANN=A|intergenic_region|MODIFIER|SGE1-ARR1|YPR198W-YPR199C|intergenic_region|YPR198W-YPR199C|||||||||	G/G	G/G	G/G	G/G	G/G	G/G	G/G	G/G	G/G	G/G	G/G	G/G	G/G	G/G	G/G	G/G	G/G	G/G	G/G	G/G	G/G	G/G	G/G	N/N	N/N	N/N	G/G	G/G	G/G	G/G	G/G	G/G	G/G	G/G	G/G	N/N	G/G	G/G	G/G	G/G	G/G	G/G	G/G	G/G	G/G	G/G
[truncated: 84 more columns]

## Sheet: File S2 Notes
Column	Description
A	Nucleotide position in Chromosome XVI as described in the Saccharomyces Genome Database (www.yeastgenome.org)
B	REFERENCE ALLELE (S288C), nucleotide sequence in the S288c reference genome
C	ALTERNATE ALLELE (SNP), nucleotide sequence that differs from the S288c reference genome in at least one other strain
D	SNP description from GATK, including general SNP location, the type of mutation, and what change in amino acid sequence occurs from the SNP.
E-ED	Nucleotide sequence calls by GATK for indicated strains listed in row 2. Asterisks denote strains whose sequences were confirmed by Sanger sequencing.
	Rows 105 and 106 in green indicate the locations of the S282 and S284 alleles.
